# Supplementary material for: Substituent effects on cyclic electron delocalization in symmetric B- and N-trisubstituted borazine derivatives
Source: Royal Society of Chemistry journal article supplement (doi:10.1039/c3ra44189j), 2013-01-01
Supplement: c3ra44189j.pdf [file c3ra44189j.pdf]

# Substituent Effects on Cyclic Electron Delocalization in Symmetric *B*- and *N*-trisubstituted Borazine Derivatives

Marija Baranac-Stojanović,<sup>\*a</sup> Milovan Stojanović<sup>b</sup>

<sup>a</sup>Faculty of Chemistry, University of Belgrade, Studentski trg 16, P.O.Box 158, 11000 Belgrade, Serbia

<sup>b</sup>Center for Chemistry ICTM, University of Belgrade, P.O.Box 473, 11000 Belgrade, Serbia

## *Supplementary Information*

### Table of Contents:

|                                                                                                  |    |
|--------------------------------------------------------------------------------------------------|----|
| Absolute energies (atomic units) and x, y, z coordinates (Å)<br>of the optimized structures..... | S2 |
|--------------------------------------------------------------------------------------------------|----|

## Absolute energies (atomic units) and x, y, z coordinates (Å) of the optimized structures

Benzene ( $D_{6h}$ )

HF/6-311+G\*\*

E = -230.7567738 a.u.

| Center<br>Number | Atomic<br>Number | Atomic<br>Type | Coordinates (Angstroms) |           |          |
|------------------|------------------|----------------|-------------------------|-----------|----------|
|                  |                  |                | X                       | Y         | Z        |
| 1                | 6                | 0              | 0.000000                | 1.386233  | 0.000000 |
| 2                | 6                | 0              | 1.200513                | 0.693116  | 0.000000 |
| 3                | 6                | 0              | 1.200513                | -0.693116 | 0.000000 |
| 4                | 6                | 0              | 0.000000                | -1.386233 | 0.000000 |
| 5                | 6                | 0              | -1.200513               | -0.693116 | 0.000000 |
| 6                | 6                | 0              | -1.200513               | 0.693116  | 0.000000 |
| 7                | 1                | 0              | 0.000000                | 2.461964  | 0.000000 |
| 8                | 1                | 0              | 2.132123                | 1.230982  | 0.000000 |
| 9                | 1                | 0              | 2.132123                | -1.230982 | 0.000000 |
| 10               | 1                | 0              | 0.000000                | -2.461964 | 0.000000 |
| 11               | 1                | 0              | -2.132123               | -1.230982 | 0.000000 |
| 12               | 1                | 0              | -2.132123               | 1.230982  | 0.000000 |

B3LYP/6-311+G\*\*

E = -232.3112416 a.u.

| Center<br>Number | Atomic<br>Number | Atomic<br>Type | Coordinates (Angstroms) |           |          |
|------------------|------------------|----------------|-------------------------|-----------|----------|
|                  |                  |                | X                       | Y         | Z        |
| 1                | 6                | 0              | 0.000000                | 1.394349  | 0.000000 |
| 2                | 6                | 0              | 1.207542                | 0.697174  | 0.000000 |
| 3                | 6                | 0              | 1.207542                | -0.697174 | 0.000000 |
| 4                | 6                | 0              | 0.000000                | -1.394349 | 0.000000 |
| 5                | 6                | 0              | -1.207542               | -0.697174 | 0.000000 |
| 6                | 6                | 0              | -1.207542               | 0.697174  | 0.000000 |
| 7                | 1                | 0              | 0.000000                | 2.478493  | 0.000000 |
| 8                | 1                | 0              | 2.146438                | 1.239246  | 0.000000 |
| 9                | 1                | 0              | 2.146438                | -1.239246 | 0.000000 |
| 10               | 1                | 0              | 0.000000                | -2.478493 | 0.000000 |
| 11               | 1                | 0              | -2.146438               | -1.239246 | 0.000000 |
| 12               | 1                | 0              | -2.146438               | 1.239246  | 0.000000 |

Cyclohexatriene ( $D_{3h}$ )

HF/6-311+G\*\*

E = -230.619985743 a.u.

---

| Center<br>Number | Atomic<br>Number | Atomic<br>Type | Coordinates (Angstroms) |           |          |
|------------------|------------------|----------------|-------------------------|-----------|----------|
|                  |                  |                | X                       | Y         | Z        |
| 1                | 6                | 0              | 0.652196                | -1.285046 | 0.000000 |
| 2                | 6                | 0              | 1.438980                | 0.077704  | 0.000000 |
| 3                | 6                | 0              | 0.786784                | 1.207341  | 0.000000 |
| 4                | 6                | 0              | -0.786784               | 1.207341  | 0.000000 |
| 5                | 6                | 0              | -1.438980               | 0.077704  | 0.000000 |
| 6                | 6                | 0              | -0.652196               | -1.285046 | 0.000000 |
| 7                | 1                | 0              | 1.222925                | -2.196034 | 0.000000 |
| 8                | 1                | 0              | 2.513284                | 0.038933  | 0.000000 |
| 9                | 1                | 0              | 1.290358                | 2.157101  | 0.000000 |
| 10               | 1                | 0              | -1.290358               | 2.157101  | 0.000000 |
| 11               | 1                | 0              | -2.513284               | 0.038933  | 0.000000 |
| 12               | 1                | 0              | -1.222925               | -2.196034 | 0.000000 |

---

*cis*-Butadiene ( $C_{2v}$ )

HF/6-311+G\*\*

E = -154.9556868 a.u.

---

| Center<br>Number | Atomic<br>Number | Atomic<br>Type | Coordinates (Angstroms) |           |           |
|------------------|------------------|----------------|-------------------------|-----------|-----------|
|                  |                  |                | X                       | Y         | Z         |
| 1                | 6                | 0              | 0.000000                | 1.539332  | -0.497759 |
| 2                | 1                | 0              | 0.000000                | 1.169059  | -1.508160 |
| 3                | 1                | 0              | 0.000000                | 2.607837  | -0.377191 |
| 4                | 6                | 0              | 0.000000                | 0.740015  | 0.556177  |
| 5                | 1                | 0              | 0.000000                | 1.192097  | 1.534842  |
| 6                | 6                | 0              | 0.000000                | -0.740015 | 0.556177  |
| 7                | 1                | 0              | 0.000000                | -1.192097 | 1.534842  |
| 8                | 6                | 0              | 0.000000                | -1.539332 | -0.497759 |
| 9                | 1                | 0              | 0.000000                | -1.169059 | -1.508160 |
| 10               | 1                | 0              | 0.000000                | -2.607837 | -0.377191 |

---

B3LYP/6-311+G\*\*

E = -156.0344785 a.u.

---

| Center<br>Number | Atomic<br>Number | Atomic<br>Type | Coordinates (Angstroms) |           |           |
|------------------|------------------|----------------|-------------------------|-----------|-----------|
|                  |                  |                | X                       | Y         | Z         |
| 1                | 6                | 0              | 0.000000                | 1.545769  | -0.502257 |
| 2                | 1                | 0              | 0.000000                | 1.171912  | -1.520671 |
| 3                | 1                | 0              | 0.000000                | 2.622479  | -0.382599 |
| 4                | 6                | 0              | 0.000000                | 0.735246  | 0.561475  |
| 5                | 1                | 0              | 0.000000                | 1.192416  | 1.547960  |
| 6                | 6                | 0              | 0.000000                | -0.735246 | 0.561475  |
| 7                | 1                | 0              | 0.000000                | -1.192416 | 1.547960  |
| 8                | 6                | 0              | 0.000000                | -1.545769 | -0.502257 |
| 9                | 1                | 0              | 0.000000                | -1.171912 | -1.520671 |
| 10               | 1                | 0              | 0.000000                | -2.622479 | -0.382599 |

---

*cis*-Butadiene (localized,  $C_{2v}$ )

HF/6-311+G\*\*

E = -154.928887824 a.u.

---

| Center<br>Number | Atomic<br>Number | Atomic<br>Type | Coordinates (Angstroms) |           |           |
|------------------|------------------|----------------|-------------------------|-----------|-----------|
|                  |                  |                | X                       | Y         | Z         |
| 1                | 6                | 0              | 0.000000                | -1.535591 | -0.505804 |
| 2                | 1                | 0              | 0.000000                | -1.129974 | -1.502395 |
| 3                | 1                | 0              | 0.000000                | -2.608524 | -0.424124 |
| 4                | 6                | 0              | 0.000000                | -0.782524 | 0.569381  |
| 5                | 1                | 0              | 0.000000                | -1.236938 | 1.545059  |
| 6                | 6                | 0              | 0.000000                | 0.782524  | 0.569381  |
| 7                | 1                | 0              | 0.000000                | 1.236938  | 1.545059  |
| 8                | 6                | 0              | 0.000000                | 1.535591  | -0.505804 |
| 9                | 1                | 0              | 0.000000                | 1.129974  | -1.502395 |
| 10               | 1                | 0              | 0.000000                | 2.608524  | -0.424124 |

---

*all-trans*-1,3,5,7-octatetraene ( $C_{2h}$ )

HF/6-311+G\*\*

E = -308.775588 a.u.

| Center<br>Number | Atomic<br>Number | Atomic<br>Type | Coordinates (Angstroms) |           |          |
|------------------|------------------|----------------|-------------------------|-----------|----------|
|                  |                  |                | X                       | Y         | Z        |
| 1                | 6                | 0              | -0.136047               | 1.835589  | 0.000000 |
| 2                | 6                | 0              | 0.392539                | 0.614719  | 0.000000 |
| 3                | 6                | 0              | -0.392539               | -0.614719 | 0.000000 |
| 4                | 6                | 0              | 0.136047                | -1.835589 | 0.000000 |
| 5                | 6                | 0              | -0.654755               | -3.065700 | 0.000000 |
| 6                | 6                | 0              | -0.136047               | -4.284771 | 0.000000 |
| 7                | 6                | 0              | 0.654755                | 3.065700  | 0.000000 |
| 8                | 6                | 0              | 0.136047                | 4.284771  | 0.000000 |
| 9                | 1                | 0              | -1.209073               | 1.950037  | 0.000000 |
| 10               | 1                | 0              | 1.465955                | 0.503763  | 0.000000 |
| 11               | 1                | 0              | -1.465955               | -0.503763 | 0.000000 |
| 12               | 1                | 0              | 1.209073                | -1.950037 | 0.000000 |
| 13               | 1                | 0              | -1.726910               | -2.947463 | 0.000000 |
| 14               | 1                | 0              | -0.761378               | -5.159418 | 0.000000 |
| 15               | 1                | 0              | 0.928910                | -4.446663 | 0.000000 |
| 16               | 1                | 0              | 1.726910                | 2.947463  | 0.000000 |
| 17               | 1                | 0              | 0.761378                | 5.159418  | 0.000000 |
| 18               | 1                | 0              | -0.928910               | 4.446663  | 0.000000 |

*all-trans*-1,3,5,7-octatetraene (localized,  $C_{2h}$ )

HF/6-311+G\*\*

E = -308.677961440 a.u.

| Center<br>Number | Atomic<br>Number | Atomic<br>Type | Coordinates (Angstroms) |           |          |
|------------------|------------------|----------------|-------------------------|-----------|----------|
|                  |                  |                | X                       | Y         | Z        |
| 1                | 6                | 0              | 0.136870                | -1.849343 | 0.000000 |
| 2                | 6                | 0              | -0.410012               | -0.662501 | 0.000000 |
| 3                | 6                | 0              | 0.410012                | 0.662501  | 0.000000 |
| 4                | 6                | 0              | -0.136870               | 1.849343  | 0.000000 |
| 5                | 6                | 0              | 0.682830                | 3.176832  | 0.000000 |
| 6                | 6                | 0              | 0.136870                | 4.371078  | 0.000000 |
| 7                | 6                | 0              | -0.682830               | -3.176832 | 0.000000 |
| 8                | 6                | 0              | -0.136870               | -4.371078 | 0.000000 |
| 9                | 1                | 0              | 1.208971                | -1.967329 | 0.000000 |
| 10               | 1                | 0              | -1.482085               | -0.545858 | 0.000000 |
| 11               | 1                | 0              | 1.482085                | 0.545858  | 0.000000 |
| 12               | 1                | 0              | -1.208971               | 1.967329  | 0.000000 |
| 13               | 1                | 0              | 1.753487                | 3.061711  | 0.000000 |
| 14               | 1                | 0              | 0.742097                | 5.260602  | 0.000000 |
| 15               | 1                | 0              | -0.931766               | 4.510435  | 0.000000 |
| 16               | 1                | 0              | -1.753487               | -3.061711 | 0.000000 |
| 17               | 1                | 0              | -0.742097               | -5.260602 | 0.000000 |
| 18               | 1                | 0              | 0.931766                | -4.510435 | 0.000000 |

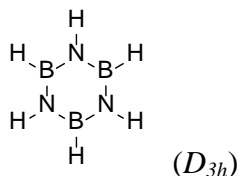

HF/6-311+G\*\*

E = -241.2193277 a.u.

| Center Number | Atomic Number | Atomic Type | Coordinates (Angstroms) |           |          |
|---------------|---------------|-------------|-------------------------|-----------|----------|
|               |               |             | X                       | Y         | Z        |
| 1             | 5             | 0           | -1.250234               | 0.721823  | 0.000000 |
| 2             | 1             | 0           | -2.282619               | 1.317871  | 0.000000 |
| 3             | 5             | 0           | 1.250234                | 0.721823  | 0.000000 |
| 4             | 1             | 0           | 2.282619                | 1.317871  | 0.000000 |
| 5             | 5             | 0           | 0.000000                | -1.443646 | 0.000000 |
| 6             | 1             | 0           | 0.000000                | -2.635742 | 0.000000 |
| 7             | 7             | 0           | 0.000000                | 1.408746  | 0.000000 |
| 8             | 1             | 0           | 0.000000                | 2.402926  | 0.000000 |
| 9             | 7             | 0           | 1.220010                | -0.704373 | 0.000000 |
| 10            | 1             | 0           | 2.080995                | -1.201463 | 0.000000 |
| 11            | 7             | 0           | -1.220010               | -0.704373 | 0.000000 |
| 12            | 1             | 0           | -2.080995               | -1.201463 | 0.000000 |

B3LYP/6-311+G\*\*

E = -242.7485061 a.u.

| Center Number | Atomic Number | Atomic Type | Coordinates (Angstroms) |           |          |
|---------------|---------------|-------------|-------------------------|-----------|----------|
|               |               |             | X                       | Y         | Z        |
| 1             | 7             | 0           | 0.000000                | 1.409784  | 0.000000 |
| 2             | 1             | 0           | 0.000000                | 2.418791  | 0.000000 |
| 3             | 7             | 0           | 1.220909                | -0.704892 | 0.000000 |
| 4             | 1             | 0           | 2.094734                | -1.209395 | 0.000000 |
| 5             | 7             | 0           | -1.220909               | -0.704892 | 0.000000 |
| 6             | 1             | 0           | -2.094734               | -1.209395 | 0.000000 |
| 7             | 5             | 0           | 1.256794                | 0.725610  | 0.000000 |
| 8             | 1             | 0           | 2.288954                | 1.321528  | 0.000000 |
| 9             | 5             | 0           | 0.000000                | -1.451221 | 0.000000 |
| 10            | 1             | 0           | 0.000000                | -2.643056 | 0.000000 |
| 11            | 5             | 0           | -1.256794               | 0.725610  | 0.000000 |
| 12            | 1             | 0           | -2.288954               | 1.321528  | 0.000000 |

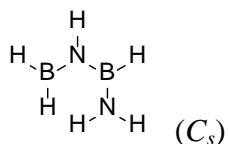

HF/6-311+G\*\*

E = -161.9209493 a.u.

| Center Number | Atomic Number | Atomic Type | Coordinates (Angstroms) |           |          |
|---------------|---------------|-------------|-------------------------|-----------|----------|
|               |               |             | X                       | Y         | Z        |
| 1             | 5             | 0           | -0.693078               | -1.559659 | 0.000000 |
| 2             | 1             | 0           | 0.426334                | -1.972625 | 0.000000 |
| 3             | 1             | 0           | -1.605719               | -2.327533 | 0.000000 |
| 4             | 5             | 0           | 0.000000                | 0.923501  | 0.000000 |
| 5             | 1             | 0           | -0.432949               | 2.035670  | 0.000000 |
| 6             | 7             | 0           | -0.940602               | -0.177336 | 0.000000 |
| 7             | 1             | 0           | -1.898549               | 0.097138  | 0.000000 |
| 8             | 7             | 0           | 1.387667                | 0.745026  | 0.000000 |
| 9             | 1             | 0           | 2.011859                | 1.516360  | 0.000000 |
| 10            | 1             | 0           | 1.834958                | -0.142052 | 0.000000 |

B3LYP/6-311+G\*\*

E = -162.985 a.u.

| Center Number | Atomic Number | Atomic Type | Coordinates (Angstroms) |           |          |
|---------------|---------------|-------------|-------------------------|-----------|----------|
|               |               |             | X                       | Y         | Z        |
| 1             | 5             | 0           | -0.689302               | -1.559325 | 0.000000 |
| 2             | 1             | 0           | 0.437879                | -1.955849 | 0.000000 |
| 3             | 1             | 0           | -1.597847               | -2.332278 | 0.000000 |
| 4             | 5             | 0           | 0.000000                | 0.932480  | 0.000000 |
| 5             | 1             | 0           | -0.427695               | 2.046543  | 0.000000 |
| 6             | 7             | 0           | -0.943591               | -0.177029 | 0.000000 |
| 7             | 1             | 0           | -1.916339               | 0.100946  | 0.000000 |
| 8             | 7             | 0           | 1.385751                | 0.739227  | 0.000000 |
| 9             | 1             | 0           | 1.822456                | -0.169933 | 0.000000 |
| 10            | 1             | 0           | 2.032938                | 1.509412  | 0.000000 |

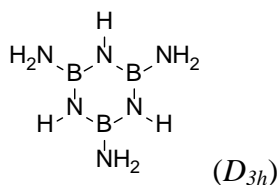

HF/6-311+G\*\*

E = -406.5144865 a.u.

| Center Number | Atomic Number | Atomic Type | Coordinates (Angstroms) |           |          |
|---------------|---------------|-------------|-------------------------|-----------|----------|
|               |               |             | X                       | Y         | Z        |
| 1             | 7             | 0           | 0.000000                | 1.415560  | 0.000000 |
| 2             | 1             | 0           | 0.000000                | 2.410063  | 0.000000 |
| 3             | 7             | 0           | -1.225911               | -0.707780 | 0.000000 |
| 4             | 1             | 0           | -2.087176               | -1.205031 | 0.000000 |
| 5             | 7             | 0           | 1.225911                | -0.707780 | 0.000000 |
| 6             | 1             | 0           | 2.087176                | -1.205031 | 0.000000 |
| 7             | 5             | 0           | -1.261634               | 0.728405  | 0.000000 |
| 8             | 5             | 0           | 0.000000                | -1.456810 | 0.000000 |
| 9             | 5             | 0           | 1.261634                | 0.728405  | 0.000000 |
| 10            | 7             | 0           | -2.495108               | 1.440552  | 0.000000 |
| 11            | 1             | 0           | -2.550576               | 2.431180  | 0.000000 |
| 12            | 1             | 0           | -3.380752               | 0.993274  | 0.000000 |
| 13            | 7             | 0           | 2.495108                | 1.440552  | 0.000000 |
| 14            | 1             | 0           | 3.380752                | 0.993274  | 0.000000 |
| 15            | 1             | 0           | 2.550576                | 2.431180  | 0.000000 |
| 16            | 7             | 0           | 0.000000                | -2.881103 | 0.000000 |
| 17            | 1             | 0           | -0.830175               | -3.424454 | 0.000000 |
| 18            | 1             | 0           | 0.830175                | -3.424454 | 0.000000 |

B3LYP/6-311+G\*\*

E = -409.0118103 a.u.

| Center Number | Atomic Number | Atomic Type | Coordinates (Angstroms) |           |          |
|---------------|---------------|-------------|-------------------------|-----------|----------|
|               |               |             | X                       | Y         | Z        |
| 1             | 7             | 0           | 0.000000                | 1.419966  | 0.000000 |
| 2             | 1             | 0           | 0.000000                | 2.428779  | 0.000000 |
| 3             | 7             | 0           | 1.229727                | -0.709983 | 0.000000 |
| 4             | 1             | 0           | 2.103384                | -1.214389 | 0.000000 |
| 5             | 7             | 0           | -1.229727               | -0.709983 | 0.000000 |
| 6             | 1             | 0           | -2.103384               | -1.214389 | 0.000000 |
| 7             | 5             | 0           | 1.266800                | 0.731387  | 0.000000 |
| 8             | 5             | 0           | 0.000000                | -1.462775 | 0.000000 |
| 9             | 5             | 0           | -1.266800               | 0.731387  | 0.000000 |
| 10            | 7             | 0           | 2.504587                | 1.446024  | 0.000000 |
| 11            | 1             | 0           | 2.561480                | 2.450416  | 0.000000 |
| 12            | 1             | 0           | 3.402862                | 0.993098  | 0.000000 |
| 13            | 7             | 0           | -2.504587               | 1.446024  | 0.000000 |
| 14            | 1             | 0           | -3.402862               | 0.993098  | 0.000000 |
| 15            | 1             | 0           | -2.561480               | 2.450416  | 0.000000 |
| 16            | 7             | 0           | 0.000000                | -2.892048 | 0.000000 |
| 17            | 1             | 0           | 0.841383                | -3.443514 | 0.000000 |
| 18            | 1             | 0           | -0.841383               | -3.443514 | 0.000000 |



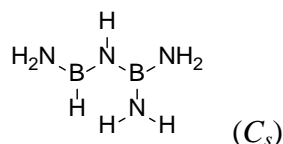

HF/6-311+G\*\*

E = -272.1243532 a.u.

---

| Center<br>Number | Atomic<br>Number | Atomic<br>Type | Coordinates (Angstroms) |           |          |
|------------------|------------------|----------------|-------------------------|-----------|----------|
|                  |                  |                | X                       | Y         | Z        |
| 1                | 7                | 0              | 0.000000                | 0.542016  | 0.000000 |
| 2                | 1                | 0              | 0.481323                | 1.415706  | 0.000000 |
| 3                | 7                | 0              | 0.319654                | -1.939107 | 0.000000 |
| 4                | 1                | 0              | 0.886580                | -2.752996 | 0.000000 |
| 5                | 5                | 0              | 0.858662                | -0.624457 | 0.000000 |
| 6                | 5                | 0              | -1.420118               | 0.613633  | 0.000000 |
| 7                | 7                | 0              | 2.273688                | -0.439436 | 0.000000 |
| 8                | 1                | 0              | 2.707391                | 0.452726  | 0.000000 |
| 9                | 1                | 0              | 2.919072                | -1.193021 | 0.000000 |
| 10               | 7                | 0              | -2.117943               | 1.840521  | 0.000000 |
| 11               | 1                | 0              | -3.109178               | 1.882368  | 0.000000 |
| 12               | 1                | 0              | -1.679772               | 2.732759  | 0.000000 |
| 13               | 1                | 0              | -0.653789               | -2.124857 | 0.000000 |
| 14               | 1                | 0              | -2.072139               | -0.386526 | 0.000000 |

---

B3LYP/6-311+G\*\*

E = -273.8365921 a.u.

---

| Center<br>Number | Atomic<br>Number | Atomic<br>Type | Coordinates (Angstroms) |           |          |
|------------------|------------------|----------------|-------------------------|-----------|----------|
|                  |                  |                | X                       | Y         | Z        |
| 1                | 7                | 0              | 0.000000                | 0.548100  | 0.000000 |
| 2                | 1                | 0              | 0.481383                | 1.438983  | 0.000000 |
| 3                | 7                | 0              | 0.329855                | -1.933617 | 0.000000 |
| 4                | 1                | 0              | 0.895242                | -2.764791 | 0.000000 |
| 5                | 5                | 0              | -1.423065               | 0.599995  | 0.000000 |
| 6                | 5                | 0              | 0.871698                | -0.617136 | 0.000000 |
| 7                | 7                | 0              | -2.147129               | 1.815375  | 0.000000 |
| 8                | 1                | 0              | -1.723821               | 2.730644  | 0.000000 |
| 9                | 1                | 0              | -3.152666               | 1.838783  | 0.000000 |
| 10               | 7                | 0              | 2.288841                | -0.421638 | 0.000000 |
| 11               | 1                | 0              | 2.951198                | -1.178527 | 0.000000 |
| 12               | 1                | 0              | 2.721949                | 0.485913  | 0.000000 |
| 13               | 1                | 0              | -0.659691               | -2.109880 | 0.000000 |
| 14               | 1                | 0              | -2.057727               | -0.412956 | 0.000000 |

---

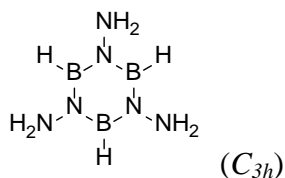

HF/6-311+G\*\*

E = -406.2116237 a.u.

| Center Number | Atomic Number | Atomic Type | Coordinates (Angstroms) |           |           |
|---------------|---------------|-------------|-------------------------|-----------|-----------|
|               |               |             | X                       | Y         | Z         |
| 1             | 7             | 0           | 0.000000                | 1.411883  | 0.000000  |
| 2             | 7             | 0           | 1.222727                | -0.705942 | 0.000000  |
| 3             | 7             | 0           | -1.222727               | -0.705942 | 0.000000  |
| 4             | 5             | 0           | 1.252123                | 0.718270  | 0.000000  |
| 5             | 5             | 0           | -0.004022               | -1.443505 | 0.000000  |
| 6             | 5             | 0           | -1.248101               | 0.725235  | 0.000000  |
| 7             | 1             | 0           | 2.276706                | 1.317934  | 0.000000  |
| 8             | 1             | 0           | 0.003011                | -2.630653 | 0.000000  |
| 9             | 1             | 0           | -2.279717               | 1.312719  | 0.000000  |
| 10            | 7             | 0           | -0.043999               | 2.827868  | 0.000000  |
| 11            | 1             | 0           | 0.435697                | 3.172527  | 0.806484  |
| 12            | 1             | 0           | 0.435697                | 3.172527  | -0.806484 |
| 13            | 7             | 0           | -2.427006               | -1.452038 | 0.000000  |
| 14            | 1             | 0           | -2.965337               | -1.208939 | 0.806484  |
| 15            | 1             | 0           | -2.965337               | -1.208939 | -0.806484 |
| 16            | 7             | 0           | 2.471005                | -1.375830 | 0.000000  |
| 17            | 1             | 0           | 2.529641                | -1.963588 | 0.806484  |
| 18            | 1             | 0           | 2.529641                | -1.963588 | -0.806484 |

B3LYP/6-311+G\*\*

E = -408.7238922 a.u.

| Center Number | Atomic Number | Atomic Type | Coordinates (Angstroms) |           |           |
|---------------|---------------|-------------|-------------------------|-----------|-----------|
|               |               |             | X                       | Y         | Z         |
| 1             | 7             | 0           | 0.000000                | 1.412361  | 0.000000  |
| 2             | 7             | 0           | 1.223140                | -0.706180 | 0.000000  |
| 3             | 7             | 0           | -1.223140               | -0.706180 | 0.000000  |
| 4             | 5             | 0           | 1.259173                | 0.722016  | 0.000000  |
| 5             | 5             | 0           | -0.004303               | -1.451484 | 0.000000  |
| 6             | 5             | 0           | -1.254870               | 0.729468  | 0.000000  |
| 7             | 1             | 0           | 2.284929                | 1.320936  | 0.000000  |
| 8             | 1             | 0           | 0.001500                | -2.639275 | 0.000000  |
| 9             | 1             | 0           | -2.286429               | 1.318338  | 0.000000  |
| 10            | 7             | 0           | -0.049082               | 2.854433  | 0.000000  |
| 11            | 1             | 0           | 0.459490                | 3.187375  | 0.814998  |
| 12            | 1             | 0           | 0.459490                | 3.187375  | -0.814998 |
| 13            | 7             | 0           | -2.447470               | -1.469722 | 0.000000  |
| 14            | 1             | 0           | -2.990093               | -1.195757 | 0.814998  |
| 15            | 1             | 0           | -2.990093               | -1.195757 | -0.814998 |
| 16            | 7             | 0           | 2.496552                | -1.384710 | 0.000000  |
| 17            | 1             | 0           | 2.530602                | -1.991618 | 0.814998  |
| 18            | 1             | 0           | 2.530602                | -1.991618 | -0.814998 |

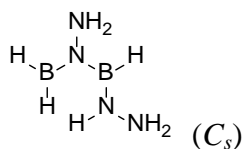

HF/6-311+G\*\*

E = -271.9179978 a.u.

| Center Number | Atomic Number | Atomic Type | Coordinates (Angstroms) |           |           |
|---------------|---------------|-------------|-------------------------|-----------|-----------|
|               |               |             | X                       | Y         | Z         |
| 1             | 7             | 0           | 0.923978                | -0.564455 | 0.000000  |
| 2             | 7             | 0           | -1.390315               | 0.400284  | 0.000000  |
| 3             | 5             | 0           | 0.574828                | -1.923440 | 0.000000  |
| 4             | 5             | 0           | 0.000000                | 0.561924  | 0.000000  |
| 5             | 1             | 0           | 1.430554                | -2.754169 | 0.000000  |
| 6             | 1             | 0           | 0.444466                | 1.662705  | 0.000000  |
| 7             | 7             | 0           | 2.296415                | -0.183715 | 0.000000  |
| 8             | 1             | 0           | 2.742148                | -0.570782 | 0.806631  |
| 9             | 1             | 0           | 2.742148                | -0.570782 | -0.806631 |
| 10            | 7             | 0           | -2.320310               | 1.451643  | 0.000000  |
| 11            | 1             | 0           | -2.194129               | 2.021546  | 0.810586  |
| 12            | 1             | 0           | -2.194129               | 2.021546  | -0.810586 |
| 13            | 1             | 0           | -1.843181               | -0.482313 | 0.000000  |
| 14            | 1             | 0           | -0.570394               | -2.246472 | 0.000000  |

B3LYP/6-311+G\*\* imaginary frequency: -123.802 cm<sup>-1</sup>

E = -273.6373543a.u.

| Center Number | Atomic Number | Atomic Type | Coordinates (Angstroms) |           |           |
|---------------|---------------|-------------|-------------------------|-----------|-----------|
|               |               |             | X                       | Y         | Z         |
| 1             | 7             | 0           | 0.925616                | -0.568135 | 0.000000  |
| 2             | 7             | 0           | -1.388782               | 0.396600  | 0.000000  |
| 3             | 5             | 0           | 0.577347                | -1.926728 | 0.000000  |
| 4             | 5             | 0           | 0.000000                | 0.568705  | 0.000000  |
| 5             | 1             | 0           | 1.431994                | -2.758992 | 0.000000  |
| 6             | 1             | 0           | 0.443298                | 1.670747  | 0.000000  |
| 7             | 7             | 0           | 2.323588                | -0.168842 | 0.000000  |
| 8             | 1             | 0           | 2.764286                | -0.586633 | 0.814773  |
| 9             | 1             | 0           | 2.764286                | -0.586633 | -0.814773 |
| 10            | 7             | 0           | -2.353115               | 1.445925  | 0.000000  |
| 11            | 1             | 0           | -2.214580               | 2.027588  | 0.820200  |
| 12            | 1             | 0           | -2.214580               | 2.027588  | -0.820200 |
| 13            | 1             | 0           | -1.838024               | -0.506653 | 0.000000  |
| 14            | 1             | 0           | -0.574557               | -2.235737 | 0.000000  |

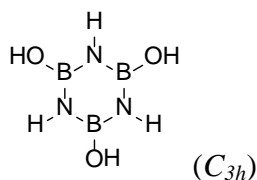

HF/6-311+G\*\*

E = -466.0705299 a.u.

| Center Number | Atomic Number | Atomic Type | Coordinates (Angstroms) |           |          |
|---------------|---------------|-------------|-------------------------|-----------|----------|
|               |               |             | X                       | Y         | Z        |
| 1             | 7             | 0           | 0.000000                | 1.413713  | 0.000000 |
| 2             | 1             | 0           | 0.034558                | 2.408485  | 0.000000 |
| 3             | 7             | 0           | -1.224311               | -0.706856 | 0.000000 |
| 4             | 1             | 0           | -2.103088               | -1.174314 | 0.000000 |
| 5             | 7             | 0           | 1.224311                | -0.706856 | 0.000000 |
| 6             | 1             | 0           | 2.068530                | -1.234170 | 0.000000 |
| 7             | 5             | 0           | -1.252198               | 0.724735  | 0.000000 |
| 8             | 5             | 0           | -0.001540               | -1.446803 | 0.000000 |
| 9             | 5             | 0           | 1.253738                | 0.722068  | 0.000000 |
| 10            | 8             | 0           | -2.468542               | 1.348387  | 0.000000 |
| 11            | 1             | 0           | -2.442924               | 2.286930  | 0.000000 |
| 12            | 8             | 0           | 2.402008                | 1.463626  | 0.000000 |
| 13            | 1             | 0           | 3.202002                | 0.972169  | 0.000000 |
| 14            | 8             | 0           | 0.066533                | -2.812013 | 0.000000 |
| 15            | 1             | 0           | -0.759078               | -3.259099 | 0.000000 |

B3LYP/6-311+G\*\*

E = -468.6751267 a.u.

| Center Number | Atomic Number | Atomic Type | Coordinates (Angstroms) |           |          |
|---------------|---------------|-------------|-------------------------|-----------|----------|
|               |               |             | X                       | Y         | Z        |
| 1             | 7             | 0           | 0.000000                | 1.417584  | 0.000000 |
| 2             | 1             | 0           | 0.036863                | 2.426691  | 0.000000 |
| 3             | 7             | 0           | -1.227664               | -0.708792 | 0.000000 |
| 4             | 1             | 0           | -2.120007               | -1.181421 | 0.000000 |
| 5             | 7             | 0           | 1.227664                | -0.708792 | 0.000000 |
| 6             | 1             | 0           | 2.083145                | -1.245270 | 0.000000 |
| 7             | 5             | 0           | -1.257598               | 0.728205  | 0.000000 |
| 8             | 5             | 0           | -0.001845               | -1.453214 | 0.000000 |
| 9             | 5             | 0           | 1.259443                | 0.725009  | 0.000000 |
| 10            | 8             | 0           | -2.491695               | 1.347764  | 0.000000 |
| 11            | 1             | 0           | -2.458116               | 2.306838  | 0.000000 |
| 12            | 8             | 0           | 2.413046                | 1.483989  | 0.000000 |
| 13            | 1             | 0           | 3.226838                | 0.975372  | 0.000000 |
| 14            | 8             | 0           | 0.078649                | -2.831754 | 0.000000 |
| 15            | 1             | 0           | -0.768722               | -3.282210 | 0.000000 |

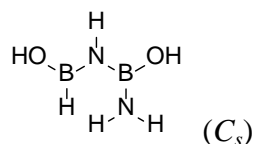

HF/6-311+G\*\*

E = -311.825015 a.u.

| Center Number | Atomic Number | Atomic Type | Coordinates (Angstroms) |           |          |
|---------------|---------------|-------------|-------------------------|-----------|----------|
|               |               |             | X                       | Y         | Z        |
| 1             | 7             | 0           | 0.000000                | 0.553650  | 0.000000 |
| 2             | 1             | 0           | -0.447284               | 1.446552  | 0.000000 |
| 3             | 7             | 0           | -0.367127               | -1.924655 | 0.000000 |
| 4             | 1             | 0           | -0.987416               | -2.699603 | 0.000000 |
| 5             | 5             | 0           | 1.409978                | 0.620474  | 0.000000 |
| 6             | 5             | 0           | -0.864452               | -0.606283 | 0.000000 |
| 7             | 8             | 0           | 2.004305                | 1.845146  | 0.000000 |
| 8             | 1             | 0           | 2.942874                | 1.822651  | 0.000000 |
| 9             | 8             | 0           | -2.228381               | -0.462097 | 0.000000 |
| 10            | 1             | 0           | -2.546832               | 0.420441  | 0.000000 |
| 11            | 1             | 0           | 2.078235                | -0.368935 | 0.000000 |
| 12            | 1             | 0           | 0.595287                | -2.159421 | 0.000000 |

B3LYP/6-311+G\*\*

E = -313.6086595 a.u.

| Center Number | Atomic Number | Atomic Type | Coordinates (Angstroms) |           |          |
|---------------|---------------|-------------|-------------------------|-----------|----------|
|               |               |             | X                       | Y         | Z        |
| 1             | 7             | 0           | 0.000000                | 0.558028  | 0.000000 |
| 2             | 1             | 0           | -0.454228               | 1.464371  | 0.000000 |
| 3             | 7             | 0           | -0.360460               | -1.926189 | 0.000000 |
| 4             | 1             | 0           | -0.979918               | -2.719084 | 0.000000 |
| 5             | 5             | 0           | -0.867417               | -0.608661 | 0.000000 |
| 6             | 5             | 0           | 1.412537                | 0.620213  | 0.000000 |
| 7             | 8             | 0           | -2.246240               | -0.475061 | 0.000000 |
| 8             | 1             | 0           | -2.563870               | 0.429733  | 0.000000 |
| 9             | 8             | 0           | 2.012448                | 1.856911  | 0.000000 |
| 10            | 1             | 0           | 2.971044                | 1.815656  | 0.000000 |
| 11            | 1             | 0           | 2.076499                | -0.374162 | 0.000000 |
| 12            | 1             | 0           | 0.618432                | -2.151950 | 0.000000 |

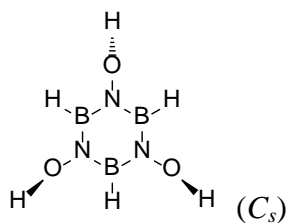

HF/6-311+G\*\*

E = -465.6445867 a.u.

| Center Number | Atomic Number | Atomic Type | Coordinates (Angstroms) |           |           |
|---------------|---------------|-------------|-------------------------|-----------|-----------|
|               |               |             | X                       | Y         | Z         |
| 1             | 7             | 0           | 0.084311                | 1.388972  | 0.000000  |
| 2             | 7             | 0           | -0.057299               | -0.694499 | -1.205603 |
| 3             | 7             | 0           | -0.057299               | -0.694499 | 1.205603  |
| 4             | 5             | 0           | 0.030690                | 0.728006  | -1.262493 |
| 5             | 5             | 0           | -0.048578               | -1.457182 | 0.000000  |
| 6             | 5             | 0           | 0.030690                | 0.728006  | 1.262493  |
| 7             | 1             | 0           | 0.058093                | 1.318318  | -2.285573 |
| 8             | 1             | 0           | -0.059387               | -2.638469 | 0.000000  |
| 9             | 1             | 0           | 0.058093                | 1.318318  | 2.285573  |
| 10            | 8             | 0           | 0.045368                | 2.773039  | 0.000000  |
| 11            | 1             | 0           | 0.939110                | 3.071289  | 0.000000  |
| 12            | 8             | 0           | 0.030690                | -1.388088 | -2.400988 |
| 13            | 1             | 0           | -0.850948               | -1.519166 | -2.705908 |
| 14            | 8             | 0           | 0.030690                | -1.388088 | 2.400988  |
| 15            | 1             | 0           | -0.850948               | -1.519166 | 2.705908  |

B3LYP/6-311+G\*\*

E = -468.2789596 a.u.

| Center Number | Atomic Number | Atomic Type | Coordinates (Angstroms) |           |           |
|---------------|---------------|-------------|-------------------------|-----------|-----------|
|               |               |             | X                       | Y         | Z         |
| 1             | 7             | 0           | -0.254281               | 1.365985  | 0.000000  |
| 2             | 7             | 0           | 0.141044                | -0.681411 | 1.203794  |
| 3             | 7             | 0           | 0.141044                | -0.681411 | -1.203794 |
| 4             | 5             | 0           | -0.123057               | 0.722562  | 1.270202  |
| 5             | 5             | 0           | 0.236843                | -1.448061 | 0.000000  |
| 6             | 5             | 0           | -0.123057               | 0.722562  | -1.270202 |
| 7             | 1             | 0           | -0.225369               | 1.305017  | 2.294163  |
| 8             | 1             | 0           | 0.404540                | -2.618312 | 0.000000  |
| 9             | 1             | 0           | -0.225369               | 1.305017  | -2.294163 |
| 10            | 8             | 0           | -0.391740               | 2.783823  | 0.000000  |
| 11            | 1             | 0           | -1.343859               | 2.944868  | 0.000000  |
| 12            | 8             | 0           | 0.141044                | -1.401836 | 2.432833  |
| 13            | 1             | 0           | 1.059487                | -1.392624 | 2.730473  |
| 14            | 8             | 0           | 0.141044                | -1.401836 | -2.432833 |
| 15            | 1             | 0           | 1.059487                | -1.392624 | -2.730473 |

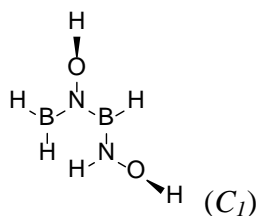

HF/6-311+G\*\*

E = -311.539267 a.u.

---

| Center<br>Number | Atomic<br>Number | Atomic<br>Type | Coordinates (Angstroms) |           |           |
|------------------|------------------|----------------|-------------------------|-----------|-----------|
|                  |                  |                | X                       | Y         | Z         |
| 1                | 5                | 0              | 0.269548                | -0.505193 | -0.064829 |
| 2                | 1                | 0              | 0.414887                | -1.678458 | -0.042853 |
| 3                | 5                | 0              | -1.490276               | 1.380115  | 0.032071  |
| 4                | 1                | 0              | -0.652063               | 2.224405  | 0.069376  |
| 5                | 1                | 0              | -2.645037               | 1.648203  | 0.049237  |
| 6                | 7                | 0              | -1.075244               | 0.043185  | -0.033525 |
| 7                | 7                | 0              | 1.392562                | 0.325346  | -0.029249 |
| 8                | 1                | 0              | 1.407110                | 1.317709  | -0.042102 |
| 9                | 8                | 0              | -2.076573               | -0.922745 | -0.076046 |
| 10               | 1                | 0              | -2.258407               | -1.166012 | 0.815446  |
| 11               | 8                | 0              | 2.662151                | -0.200072 | -0.059171 |
| 12               | 1                | 0              | 2.931296                | -0.317641 | 0.835841  |

---

B3LYP/6-311+G\*\* imaginary frequency: -67.768 cm<sup>-1</sup>

E = -313.339597 a.u.

---

| Center<br>Number | Atomic<br>Number | Atomic<br>Type | Coordinates (Angstroms) |           |           |
|------------------|------------------|----------------|-------------------------|-----------|-----------|
|                  |                  |                | X                       | Y         | Z         |
| 1                | 5                | 0              | 0.268651                | -0.508308 | -0.066815 |
| 2                | 1                | 0              | 0.410121                | -1.683322 | -0.046798 |
| 3                | 5                | 0              | -1.488268               | 1.394995  | 0.032857  |
| 4                | 1                | 0              | -0.631586               | 2.224520  | 0.070307  |
| 5                | 1                | 0              | -2.641267               | 1.673666  | 0.050758  |
| 6                | 7                | 0              | -1.077026               | 0.059687  | -0.034038 |
| 7                | 7                | 0              | 1.390924                | 0.322130  | -0.030299 |
| 8                | 1                | 0              | 1.406257                | 1.331674  | -0.041824 |
| 9                | 8                | 0              | -2.110393               | -0.937873 | -0.079062 |
| 10               | 1                | 0              | -2.283265               | -1.157762 | 0.844598  |
| 11               | 8                | 0              | 2.697908                | -0.206035 | -0.060985 |
| 12               | 1                | 0              | 2.940411                | -0.343676 | 0.863485  |

---

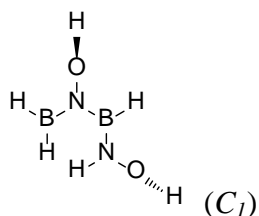

HF/6-311+G\*\*

E = -311.5396443 a.u.

---

| Center<br>Number | Atomic<br>Number | Atomic<br>Type | Coordinates (Angstroms) |           |           |
|------------------|------------------|----------------|-------------------------|-----------|-----------|
|                  |                  |                | X                       | Y         | Z         |
| 1                | 5                | 0              | 0.270054                | -0.506894 | 0.001883  |
| 2                | 1                | 0              | 0.416927                | -1.678744 | 0.053619  |
| 3                | 5                | 0              | -1.489655               | 1.380610  | 0.018323  |
| 4                | 1                | 0              | -0.652325               | 2.225487  | -0.026083 |
| 5                | 1                | 0              | -2.643853               | 1.649890  | 0.049439  |
| 6                | 7                | 0              | -1.074244               | 0.042329  | 0.033179  |
| 7                | 7                | 0              | 1.392015                | 0.323689  | -0.051291 |
| 8                | 1                | 0              | 1.406013                | 1.315065  | -0.096919 |
| 9                | 8                | 0              | -2.074040               | -0.924848 | 0.085327  |
| 10               | 1                | 0              | -2.295386               | -1.136462 | -0.805397 |
| 11               | 8                | 0              | 2.661397                | -0.202173 | -0.080689 |
| 12               | 1                | 0              | 2.943372                | -0.289774 | 0.813989  |

---

B3LYP/6-311+G\*\*

E = -313.3399737 a.u.

---

| Center<br>Number | Atomic<br>Number | Atomic<br>Type | Coordinates (Angstroms) |           |           |
|------------------|------------------|----------------|-------------------------|-----------|-----------|
|                  |                  |                | X                       | Y         | Z         |
| 1                | 5                | 0              | 0.268686                | -0.509209 | 0.001708  |
| 2                | 1                | 0              | 0.411142                | -1.682932 | 0.056985  |
| 3                | 5                | 0              | -1.488677               | 1.396016  | 0.019159  |
| 4                | 1                | 0              | -0.633074               | 2.226262  | -0.025652 |
| 5                | 1                | 0              | -2.641360               | 1.674540  | 0.050670  |
| 6                | 7                | 0              | -1.076363               | 0.059329  | 0.033444  |
| 7                | 7                | 0              | 1.390430                | 0.320608  | -0.051697 |
| 8                | 1                | 0              | 1.404941                | 1.329016  | -0.100794 |
| 9                | 8                | 0              | -2.109297               | -0.938170 | 0.087442  |
| 10               | 1                | 0              | -2.293668               | -1.155191 | -0.834764 |
| 11               | 8                | 0              | 2.697136                | -0.207270 | -0.083034 |
| 12               | 1                | 0              | 2.950789                | -0.321775 | 0.841725  |

---



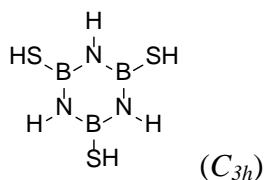

HF/6-311+G\*\*

E = -1433.9416863 a.u.

---

| Center Number | Atomic Number | Atomic Type | Coordinates (Angstroms) |           |          |
|---------------|---------------|-------------|-------------------------|-----------|----------|
|               |               |             | X                       | Y         | Z        |
| 1             | 5             | 0           | 1.247198                | 0.718175  | 0.000000 |
| 2             | 5             | 0           | -0.001641               | -1.439193 | 0.000000 |
| 3             | 5             | 0           | -1.245557               | 0.721017  | 0.000000 |
| 4             | 7             | 0           | 0.000000                | 1.412484  | 0.000000 |
| 5             | 1             | 0           | 0.006210                | 2.406900  | 0.000000 |
| 6             | 7             | 0           | 1.223247                | -0.706242 | 0.000000 |
| 7             | 1             | 0           | 2.081332                | -1.208828 | 0.000000 |
| 8             | 7             | 0           | -1.223247               | -0.706242 | 0.000000 |
| 9             | 1             | 0           | -2.087541               | -1.198072 | 0.000000 |
| 10            | 16            | 0           | 0.081370                | -3.283964 | 0.000000 |
| 11            | 1             | 0           | -1.222908               | -3.546293 | 0.000000 |
| 12            | 16            | 0           | -2.884681               | 1.571514  | 0.000000 |
| 13            | 1             | 0           | -2.459726               | 2.832216  | 0.000000 |
| 14            | 16            | 0           | 2.803312                | 1.712450  | 0.000000 |
| 15            | 1             | 0           | 3.682634                | 0.714077  | 0.000000 |

---

B3LYP/6-311+G\*\*

E = -1437.5032446 a.u.

---

| Center Number | Atomic Number | Atomic Type | Coordinates (Angstroms) |           |          |
|---------------|---------------|-------------|-------------------------|-----------|----------|
|               |               |             | X                       | Y         | Z        |
| 1             | 5             | 0           | -1.254149               | 0.722292  | 0.000000 |
| 2             | 5             | 0           | 0.001551                | -1.447271 | 0.000000 |
| 3             | 5             | 0           | 1.252598                | 0.724979  | 0.000000 |
| 4             | 7             | 0           | 0.000000                | 1.416502  | 0.000000 |
| 5             | 1             | 0           | -0.005969               | 2.425209  | 0.000000 |
| 6             | 7             | 0           | -1.226726               | -0.708251 | 0.000000 |
| 7             | 1             | 0           | -2.097308               | -1.217774 | 0.000000 |
| 8             | 7             | 0           | 1.226726                | -0.708251 | 0.000000 |
| 9             | 1             | 0           | 2.103277                | -1.207435 | 0.000000 |
| 10            | 16            | 0           | -0.089327               | -3.289331 | 0.000000 |
| 11            | 1             | 0           | 1.235447                | -3.533809 | 0.000000 |
| 12            | 16            | 0           | 2.893308                | 1.567306  | 0.000000 |
| 13            | 1             | 0           | 2.442645                | 2.836833  | 0.000000 |
| 14            | 16            | 0           | -2.803981               | 1.722025  | 0.000000 |
| 15            | 1             | 0           | -3.678092               | 0.696977  | 0.000000 |

---

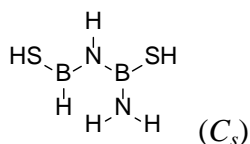

HF/6-311+G\*\*

E = -957.0744674 a.u.

---

| Center<br>Number | Atomic<br>Number | Atomic<br>Type | Coordinates (Angstroms) |           |          |
|------------------|------------------|----------------|-------------------------|-----------|----------|
|                  |                  |                | X                       | Y         | Z        |
| 1                | 5                | 0              | -1.347413               | 0.688092  | 0.000000 |
| 2                | 1                | 0              | -2.235433               | -0.097092 | 0.000000 |
| 3                | 5                | 0              | 0.513870                | -1.069967 | 0.000000 |
| 4                | 7                | 0              | 0.000000                | 0.279213  | 0.000000 |
| 5                | 1                | 0              | 0.684125                | 1.004033  | 0.000000 |
| 6                | 7                | 0              | -0.311662               | -2.201296 | 0.000000 |
| 7                | 1                | 0              | 0.049043                | -3.126217 | 0.000000 |
| 8                | 1                | 0              | -1.303053               | -2.152651 | 0.000000 |
| 9                | 16               | 0              | 2.344797                | -1.381252 | 0.000000 |
| 10               | 1                | 0              | 2.772845                | -0.121846 | 0.000000 |
| 11               | 16               | 0              | -1.753514               | 2.474466  | 0.000000 |
| 12               | 1                | 0              | -3.078708               | 2.366313  | 0.000000 |

---

B3LYP/6-311+G\*\*

E = -959.4952595 a.u.

---

| Center<br>Number | Atomic<br>Number | Atomic<br>Type | Coordinates (Angstroms) |           |          |
|------------------|------------------|----------------|-------------------------|-----------|----------|
|                  |                  |                | X                       | Y         | Z        |
| 1                | 5                | 0              | -1.362984               | 0.656993  | 0.000000 |
| 2                | 1                | 0              | -2.221395               | -0.164774 | 0.000000 |
| 3                | 5                | 0              | 0.554971                | -1.052838 | 0.000000 |
| 4                | 7                | 0              | 0.000000                | 0.289096  | 0.000000 |
| 5                | 1                | 0              | 0.675447                | 1.042477  | 0.000000 |
| 6                | 7                | 0              | -0.256180               | -2.199755 | 0.000000 |
| 7                | 1                | 0              | 0.114220                | -3.135293 | 0.000000 |
| 8                | 1                | 0              | -1.262256               | -2.155037 | 0.000000 |
| 9                | 16               | 0              | 2.387409                | -1.324601 | 0.000000 |
| 10               | 1                | 0              | 2.762037                | -0.030898 | 0.000000 |
| 11               | 16               | 0              | -1.829391               | 2.421992  | 0.000000 |
| 12               | 1                | 0              | -3.163031               | 2.239112  | 0.000000 |

---

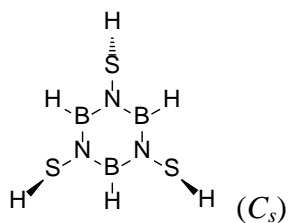

HF/6-311+G\*\*

E = -1433.7323776 a.u.

| Center Number | Atomic Number | Atomic Type | Coordinates (Angstroms) |           |           |
|---------------|---------------|-------------|-------------------------|-----------|-----------|
|               |               |             | X                       | Y         | Z         |
| 1             | 7             | 0           | 0.000001                | 1.421789  | 0.009253  |
| 2             | 7             | 0           | -1.231510               | -0.711085 | -0.005809 |
| 3             | 7             | 0           | 1.231509                | -0.711086 | -0.005809 |
| 4             | 5             | 0           | -1.256240               | 0.725160  | 0.005144  |
| 5             | 5             | 0           | -0.000001               | -1.450654 | -0.022851 |
| 6             | 5             | 0           | 1.256241                | 0.725159  | 0.005144  |
| 7             | 1             | 0           | -2.279970               | 1.316094  | 0.011063  |
| 8             | 1             | 0           | -0.000001               | -2.632442 | -0.043688 |
| 9             | 1             | 0           | 2.279971                | 1.316092  | 0.011063  |
| 10            | 16            | 0           | 0.000001                | 3.137484  | 0.080820  |
| 11            | 1             | 0           | 0.000001                | 3.399691  | -1.226340 |
| 12            | 16            | 0           | 2.717706                | -1.568402 | -0.075904 |
| 13            | 1             | 0           | 2.941229                | -1.702994 | 1.231543  |
| 14            | 16            | 0           | -2.717707               | -1.568400 | -0.075904 |
| 15            | 1             | 0           | -2.941230               | -1.702992 | 1.231543  |

B3LYP/6-311+G\*\* (C<sub>1</sub>)

E = -1437.3025644 a.u.

| Center Number | Atomic Number | Atomic Type | Coordinates (Angstroms) |           |           |
|---------------|---------------|-------------|-------------------------|-----------|-----------|
|               |               |             | X                       | Y         | Z         |
| 1             | 7             | 0           | -0.094635               | 1.414740  | 0.004173  |
| 2             | 7             | 0           | -1.177957               | -0.789631 | -0.001609 |
| 3             | 7             | 0           | 1.272645                | -0.625858 | -0.001697 |
| 4             | 5             | 0           | -1.309911               | 0.643610  | 0.003499  |
| 5             | 5             | 0           | 0.097385                | -1.456676 | -0.018511 |
| 6             | 5             | 0           | 1.212491                | 0.812213  | 0.003321  |
| 7             | 1             | 0           | -2.372174               | 1.165305  | 0.008245  |
| 8             | 1             | 0           | 0.176182                | -2.637391 | -0.035611 |
| 9             | 1             | 0           | 2.195792                | 1.470782  | 0.007656  |
| 10            | 16            | 0           | -0.211411               | 3.161336  | 0.083083  |
| 11            | 1             | 0           | -0.225431               | 3.405786  | -1.247669 |
| 12            | 16            | 0           | 2.844061                | -1.397442 | -0.078493 |
| 13            | 1             | 0           | 3.061974                | -1.504980 | 1.252630  |
| 14            | 16            | 0           | -2.632661               | -1.763510 | -0.078671 |
| 15            | 1             | 0           | -2.836355               | -1.896130 | 1.252430  |

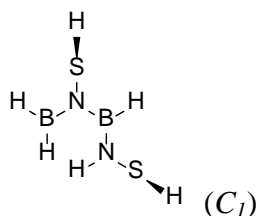

HF/6-311+G\*\*

E = -956.9321737 a.u.

---

| Center<br>Number | Atomic<br>Number | Atomic<br>Type | Coordinates (Angstroms) |           |           |
|------------------|------------------|----------------|-------------------------|-----------|-----------|
|                  |                  |                | X                       | Y         | Z         |
| 1                | 7                | 0              | -1.352434               | 0.411338  | 0.016853  |
| 2                | 7                | 0              | 1.158665                | 0.340163  | 0.002800  |
| 3                | 5                | 0              | -0.145362               | -0.318559 | -0.012994 |
| 4                | 5                | 0              | 1.366777                | 1.742741  | 0.011940  |
| 5                | 1                | 0              | -0.193861               | -1.500273 | -0.041649 |
| 6                | 1                | 0              | 2.463905                | 2.192318  | 0.006286  |
| 7                | 16               | 0              | 2.543687                | -0.687418 | -0.078850 |
| 8                | 1                | 0              | 2.694706                | -0.928371 | 1.223487  |
| 9                | 16               | 0              | -2.893568               | -0.290399 | -0.082421 |
| 10               | 1                | 0              | -3.180526               | -0.376882 | 1.217948  |
| 11               | 1                | 0              | 0.425210                | 2.471694  | 0.027658  |
| 12               | 1                | 0              | -1.362029               | 1.405172  | 0.014312  |

---

B3LYP/6-311+G\*\*

E = -959.3570514 a.u.

---

| Center<br>Number | Atomic<br>Number | Atomic<br>Type | Coordinates (Angstroms) |           |           |
|------------------|------------------|----------------|-------------------------|-----------|-----------|
|                  |                  |                | X                       | Y         | Z         |
| 1                | 7                | 0              | -1.348550               | 0.407158  | 0.043919  |
| 2                | 7                | 0              | 1.155785                | 0.356322  | 0.007241  |
| 3                | 5                | 0              | -0.145768               | -0.324306 | -0.014797 |
| 4                | 5                | 0              | 1.358671                | 1.755412  | 0.003253  |
| 5                | 1                | 0              | -0.188175               | -1.506844 | -0.068047 |
| 6                | 1                | 0              | 2.452313                | 2.215922  | 0.001015  |
| 7                | 16               | 0              | 2.576362                | -0.687677 | -0.079508 |
| 8                | 1                | 0              | 2.654602                | -0.991210 | 1.236340  |
| 9                | 16               | 0              | -2.917789               | -0.294717 | -0.092608 |
| 10               | 1                | 0              | -3.217427               | -0.383771 | 1.226581  |
| 11               | 1                | 0              | 0.399086                | 2.466557  | 0.002414  |
| 12               | 1                | 0              | -1.352719               | 1.417753  | 0.055142  |

---

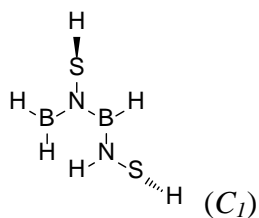

HF/6-311+G\*\*

E = -956.9322831 a.u.

---

| Center<br>Number | Atomic<br>Number | Atomic<br>Type | Coordinates (Angstroms) |           |           |
|------------------|------------------|----------------|-------------------------|-----------|-----------|
|                  |                  |                | X                       | Y         | Z         |
| 1                | 7                | 0              | -1.352352               | 0.411882  | 0.015351  |
| 2                | 7                | 0              | 1.158744                | 0.340680  | -0.005223 |
| 3                | 5                | 0              | -0.145355               | -0.317779 | -0.019859 |
| 4                | 5                | 0              | 1.367123                | 1.743198  | 0.000420  |
| 5                | 1                | 0              | -0.194056               | -1.499227 | -0.057961 |
| 6                | 1                | 0              | 2.464338                | 2.192570  | -0.003527 |
| 7                | 16               | 0              | -2.892847               | -0.295072 | 0.079665  |
| 8                | 1                | 0              | -3.184347               | -0.309379 | -1.222481 |
| 9                | 16               | 0              | 2.543717                | -0.687485 | -0.079263 |
| 10               | 1                | 0              | 2.683102                | -0.934416 | 1.223207  |
| 11               | 1                | 0              | 0.425511                | 2.472223  | 0.009022  |
| 12               | 1                | 0              | -1.362049               | 1.404112  | 0.071593  |

---

B3LYP/6-311+G\*\*

E = -959.357133 a.u.

---

| Center<br>Number | Atomic<br>Number | Atomic<br>Type | Coordinates (Angstroms) |           |           |
|------------------|------------------|----------------|-------------------------|-----------|-----------|
|                  |                  |                | X                       | Y         | Z         |
| 1                | 7                | 0              | 1.348797                | 0.409892  | -0.001252 |
| 2                | 7                | 0              | -1.156091               | 0.356981  | -0.003892 |
| 3                | 5                | 0              | 0.145785                | -0.322851 | 0.023003  |
| 4                | 5                | 0              | -1.359723               | 1.755856  | -0.009637 |
| 5                | 1                | 0              | 0.188476                | -1.506032 | 0.060329  |
| 6                | 1                | 0              | -2.453576               | 2.215875  | -0.013500 |
| 7                | 16               | 0              | 2.917484                | -0.301350 | -0.083545 |
| 8                | 1                | 0              | 3.214203                | -0.298153 | 1.239342  |
| 9                | 16               | 0              | -2.576273               | -0.687531 | 0.082497  |
| 10               | 1                | 0              | -2.641188               | -1.008793 | -1.229776 |
| 11               | 1                | 0              | -0.400383               | 2.467344  | -0.010119 |
| 12               | 1                | 0              | 1.353833                | 1.418726  | -0.060328 |

---

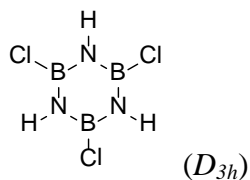

HF/6-311+G\*\*

E = -1618.1691107 a.u.

| Center Number | Atomic Number | Atomic Type | Coordinates (Angstroms) |           |          |
|---------------|---------------|-------------|-------------------------|-----------|----------|
|               |               |             | X                       | Y         | Z        |
| 1             | 5             | 0           | 1.235404                | 0.713261  | 0.000000 |
| 2             | 5             | 0           | -1.235404               | 0.713261  | 0.000000 |
| 3             | 5             | 0           | 0.000000                | -1.426522 | 0.000000 |
| 4             | 7             | 0           | 0.000000                | 1.411381  | 0.000000 |
| 5             | 7             | 0           | -1.222292               | -0.705690 | 0.000000 |
| 6             | 7             | 0           | 1.222292                | -0.705690 | 0.000000 |
| 7             | 1             | 0           | 0.000000                | 2.406618  | 0.000000 |
| 8             | 1             | 0           | -2.084192               | -1.203309 | 0.000000 |
| 9             | 1             | 0           | 2.084192                | -1.203309 | 0.000000 |
| 10            | 17            | 0           | 0.000000                | -3.211716 | 0.000000 |
| 11            | 17            | 0           | 2.781428                | 1.605858  | 0.000000 |
| 12            | 17            | 0           | -2.781428               | 1.605858  | 0.000000 |

B3LYP/6-311+G\*\*

E = -1621.7782558 a.u.

| Center Number | Atomic Number | Atomic Type | Coordinates (Angstroms) |           |          |
|---------------|---------------|-------------|-------------------------|-----------|----------|
|               |               |             | X                       | Y         | Z        |
| 1             | 7             | 0           | 0.000000                | 1.415349  | 0.000000 |
| 2             | 1             | 0           | 0.000000                | 2.425075  | 0.000000 |
| 3             | 7             | 0           | 1.225728                | -0.707674 | 0.000000 |
| 4             | 1             | 0           | 2.100176                | -1.212537 | 0.000000 |
| 5             | 7             | 0           | -1.225728               | -0.707674 | 0.000000 |
| 6             | 1             | 0           | -2.100176               | -1.212537 | 0.000000 |
| 7             | 5             | 0           | 1.243178                | 0.717749  | 0.000000 |
| 8             | 5             | 0           | 0.000000                | -1.435499 | 0.000000 |
| 9             | 5             | 0           | -1.243178               | 0.717749  | 0.000000 |
| 10            | 17            | 0           | -2.789062               | 1.610266  | 0.000000 |
| 11            | 17            | 0           | 2.789062                | 1.610266  | 0.000000 |
| 12            | 17            | 0           | 0.000000                | -3.220531 | 0.000000 |

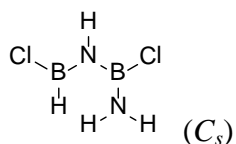

HF/6-311+G\*\*

E = -1079.8898596 a.u.

| Center Number | Atomic Number | Atomic Type | Coordinates (Angstroms) |           |          |
|---------------|---------------|-------------|-------------------------|-----------|----------|
|               |               |             | X                       | Y         | Z        |
| 1             | 5             | 0           | -1.324555               | 0.730681  | 0.000000 |
| 2             | 1             | 0           | -2.248953               | -0.005221 | 0.000000 |
| 3             | 5             | 0           | 0.464448                | -1.078851 | 0.000000 |
| 4             | 7             | 0           | -0.358762               | -2.200059 | 0.000000 |
| 5             | 1             | 0           | -1.350607               | -2.151610 | 0.000000 |
| 6             | 1             | 0           | 0.012144                | -3.121027 | 0.000000 |
| 7             | 7             | 0           | 0.000000                | 0.282452  | 0.000000 |
| 8             | 1             | 0           | 0.713519                | 0.980117  | 0.000000 |
| 9             | 17            | 0           | 2.245681                | -1.333037 | 0.000000 |
| 10            | 17            | 0           | -1.675930               | 2.477851  | 0.000000 |

B3LYP/6-311+G\*\*

E = -1082.3418264 a.u.

| Center Number | Atomic Number | Atomic Type | Coordinates (Angstroms) |           |          |
|---------------|---------------|-------------|-------------------------|-----------|----------|
|               |               |             | X                       | Y         | Z        |
| 1             | 7             | 0           | 0.000000                | 0.287507  | 0.000000 |
| 2             | 1             | 0           | 0.717977                | 1.002378  | 0.000000 |
| 3             | 7             | 0           | -0.338969               | -2.202088 | 0.000000 |
| 4             | 1             | 0           | 0.034534                | -3.136752 | 0.000000 |
| 5             | 5             | 0           | -1.332791               | 0.722642  | 0.000000 |
| 6             | 5             | 0           | 0.484320                | -1.075968 | 0.000000 |
| 7             | 17            | 0           | 2.266383                | -1.314692 | 0.000000 |
| 8             | 17            | 0           | -1.710275               | 2.461025  | 0.000000 |
| 9             | 1             | 0           | -2.245894               | -0.033793 | 0.000000 |
| 10            | 1             | 0           | -1.345303               | -2.150809 | 0.000000 |

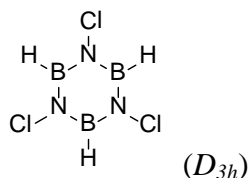

HF/6-311+G\*\*

E = -1617.8258525 a.u.

| Center Number | Atomic Number | Atomic Type | Coordinates (Angstroms) |           |          |
|---------------|---------------|-------------|-------------------------|-----------|----------|
|               |               |             | X                       | Y         | Z        |
| 1             | 7             | 0           | 0.000000                | 1.397280  | 0.000000 |
| 2             | 7             | 0           | 1.210080                | -0.698640 | 0.000000 |
| 3             | 7             | 0           | -1.210080               | -0.698640 | 0.000000 |
| 4             | 5             | 0           | 0.000000                | -1.463477 | 0.000000 |
| 5             | 1             | 0           | 0.000000                | -2.641379 | 0.000000 |
| 6             | 5             | 0           | -1.267408               | 0.731739  | 0.000000 |
| 7             | 1             | 0           | -2.287501               | 1.320690  | 0.000000 |
| 8             | 5             | 0           | 1.267408                | 0.731739  | 0.000000 |
| 9             | 1             | 0           | 2.287501                | 1.320690  | 0.000000 |
| 10            | 17            | 0           | 0.000000                | 3.104101  | 0.000000 |
| 11            | 17            | 0           | 2.688230                | -1.552051 | 0.000000 |
| 12            | 17            | 0           | -2.688230               | -1.552051 | 0.000000 |

B3LYP/6-311+G\*\*

E = -1621.461356 a.u.

| Center Number | Atomic Number | Atomic Type | Coordinates (Angstroms) |           |          |
|---------------|---------------|-------------|-------------------------|-----------|----------|
|               |               |             | X                       | Y         | Z        |
| 1             | 7             | 0           | 0.000000                | 1.392414  | 0.000000 |
| 2             | 7             | 0           | -1.205866               | -0.696207 | 0.000000 |
| 3             | 7             | 0           | 1.205866                | -0.696207 | 0.000000 |
| 4             | 5             | 0           | 0.000000                | -1.472076 | 0.000000 |
| 5             | 1             | 0           | 0.000000                | -2.651556 | 0.000000 |
| 6             | 5             | 0           | 1.274855                | 0.736038  | 0.000000 |
| 7             | 1             | 0           | 2.296315                | 1.325778  | 0.000000 |
| 8             | 5             | 0           | -1.274855               | 0.736038  | 0.000000 |
| 9             | 1             | 0           | -2.296315               | 1.325778  | 0.000000 |
| 10            | 17            | 0           | 0.000000                | 3.137967  | 0.000000 |
| 11            | 17            | 0           | -2.717559               | -1.568983 | 0.000000 |
| 12            | 17            | 0           | 2.717559                | -1.568983 | 0.000000 |



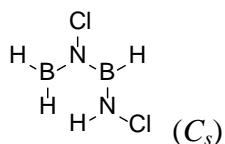

HF/6-311+G\*\*

E = -1079.6595181 a.u.

| Center Number | Atomic Number | Atomic Type | Coordinates (Angstroms) |           |          |
|---------------|---------------|-------------|-------------------------|-----------|----------|
|               |               |             | X                       | Y         | Z        |
| 1             | 7             | 0           | 0.884699                | -0.802409 | 0.000000 |
| 2             | 7             | 0           | -1.392543               | 0.178604  | 0.000000 |
| 3             | 5             | 0           | 0.000000                | 0.354669  | 0.000000 |
| 4             | 1             | 0           | 0.450823                | 1.443981  | 0.000000 |
| 5             | 5             | 0           | 0.538303                | -2.170479 | 0.000000 |
| 6             | 1             | 0           | 1.370606                | -3.010984 | 0.000000 |
| 7             | 17            | 0           | 2.559776                | -0.418420 | 0.000000 |
| 8             | 17            | 0           | -2.469314               | 1.485763  | 0.000000 |
| 9             | 1             | 0           | -1.877200               | -0.687417 | 0.000000 |
| 10            | 1             | 0           | -0.618704               | -2.444738 | 0.000000 |

B3LYP/6-311+G\*\*

E = -1082.1277512 a.u.

| Center Number | Atomic Number | Atomic Type | Coordinates (Angstroms) |           |          |
|---------------|---------------|-------------|-------------------------|-----------|----------|
|               |               |             | X                       | Y         | Z        |
| 1             | 7             | 0           | 0.878033                | -0.817448 | 0.000000 |
| 2             | 7             | 0           | -1.388484               | 0.170922  | 0.000000 |
| 3             | 5             | 0           | 0.538301                | -2.179603 | 0.000000 |
| 4             | 1             | 0           | 1.362363                | -3.029821 | 0.000000 |
| 5             | 5             | 0           | 0.000000                | 0.355331  | 0.000000 |
| 6             | 1             | 0           | 0.452384                | 1.445760  | 0.000000 |
| 7             | 17            | 0           | 2.594971                | -0.409936 | 0.000000 |
| 8             | 17            | 0           | -2.502370               | 1.490680  | 0.000000 |
| 9             | 1             | 0           | -1.879294               | -0.710341 | 0.000000 |
| 10            | 1             | 0           | -0.628011               | -2.431211 | 0.000000 |

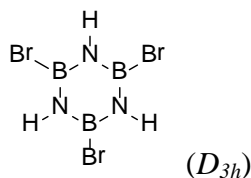

HF/6-311+G\*\*

E = -7956.7333491 a.u.

| Center Number | Atomic Number | Atomic Type | Coordinates (Angstroms) |           |          |
|---------------|---------------|-------------|-------------------------|-----------|----------|
|               |               |             | X                       | Y         | Z        |
| 1             | 7             | 0           | 0.000000                | 1.412686  | 0.000000 |
| 2             | 1             | 0           | 0.000000                | 2.407493  | 0.000000 |
| 3             | 7             | 0           | 1.223422                | -0.706343 | 0.000000 |
| 4             | 1             | 0           | 2.084950                | -1.203747 | 0.000000 |
| 5             | 7             | 0           | -1.223422               | -0.706343 | 0.000000 |
| 6             | 1             | 0           | -2.084950               | -1.203747 | 0.000000 |
| 7             | 5             | 0           | 1.232820                | 0.711769  | 0.000000 |
| 8             | 5             | 0           | 0.000000                | -1.423538 | 0.000000 |
| 9             | 5             | 0           | -1.232820               | 0.711769  | 0.000000 |
| 10            | 35            | 0           | 0.000000                | -3.375577 | 0.000000 |
| 11            | 35            | 0           | 2.923335                | 1.687788  | 0.000000 |
| 12            | 35            | 0           | -2.923335               | 1.687788  | 0.000000 |

B3LYP/6-311+G\*\*

E = -7963.5207673 a.u.

| Center Number | Atomic Number | Atomic Type | Coordinates (Angstroms) |           |          |
|---------------|---------------|-------------|-------------------------|-----------|----------|
|               |               |             | X                       | Y         | Z        |
| 1             | 7             | 0           | 0.000000                | 1.416024  | 0.000000 |
| 2             | 1             | 0           | 0.000000                | 2.425392  | 0.000000 |
| 3             | 7             | 0           | 1.226313                | -0.708012 | 0.000000 |
| 4             | 1             | 0           | 2.100451                | -1.212696 | 0.000000 |
| 5             | 7             | 0           | -1.226313               | -0.708012 | 0.000000 |
| 6             | 1             | 0           | -2.100451               | -1.212696 | 0.000000 |
| 7             | 5             | 0           | 1.241318                | 0.716675  | 0.000000 |
| 8             | 5             | 0           | 0.000000                | -1.433351 | 0.000000 |
| 9             | 5             | 0           | -1.241318               | 0.716675  | 0.000000 |
| 10            | 35            | 0           | 0.000000                | -3.384406 | 0.000000 |
| 11            | 35            | 0           | 2.930981                | 1.692203  | 0.000000 |
| 12            | 35            | 0           | -2.930981               | 1.692203  | 0.000000 |

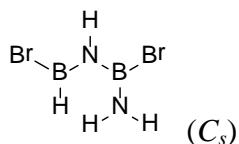

HF/6-311+G\*\*

E = -5305.6004925 a.u.

| Center Number | Atomic Number | Atomic Type | Coordinates (Angstroms) |           |          |
|---------------|---------------|-------------|-------------------------|-----------|----------|
|               |               |             | X                       | Y         | Z        |
| 1             | 7             | 0           | 0.000000                | 0.149780  | 0.000000 |
| 2             | 1             | 0           | 0.816938                | -0.422646 | 0.000000 |
| 3             | 7             | 0           | -2.507393               | 0.045747  | 0.000000 |
| 4             | 1             | 0           | -3.345530               | -0.486307 | 0.000000 |
| 5             | 5             | 0           | 0.191606                | 1.533842  | 0.000000 |
| 6             | 5             | 0           | -1.254682               | -0.553426 | 0.000000 |
| 7             | 35            | 0           | 1.994477                | 2.271244  | 0.000000 |
| 8             | 35            | 0           | -1.173413               | -2.519816 | 0.000000 |
| 9             | 1             | 0           | -2.641730               | 1.030270  | 0.000000 |
| 10            | 1             | 0           | -0.699806               | 2.307943  | 0.000000 |

B3LYP/6-311+G\*\*

E = -5310.1709541 a.u.

| Center Number | Atomic Number | Atomic Type | Coordinates (Angstroms) |           |          |
|---------------|---------------|-------------|-------------------------|-----------|----------|
|               |               |             | X                       | Y         | Z        |
| 1             | 7             | 0           | 0.000000                | 0.147332  | 0.000000 |
| 2             | 1             | 0           | 0.854096                | -0.397118 | 0.000000 |
| 3             | 7             | 0           | -2.505212               | -0.065467 | 0.000000 |
| 4             | 1             | 0           | -3.336430               | -0.633031 | 0.000000 |
| 5             | 5             | 0           | 0.128242                | 1.542566  | 0.000000 |
| 6             | 5             | 0           | -1.226937               | -0.619711 | 0.000000 |
| 7             | 35            | 0           | 1.887527                | 2.367473  | 0.000000 |
| 8             | 35            | 0           | -1.059170               | -2.577651 | 0.000000 |
| 9             | 1             | 0           | -2.673422               | 0.928766  | 0.000000 |
| 10            | 1             | 0           | -0.806798               | 2.270299  | 0.000000 |

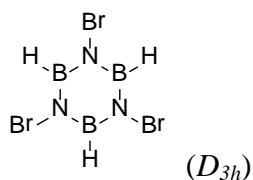

HF/6-311+G\*\*

E = -7956.4299676 a.u.

| Center Number | Atomic Number | Atomic Type | Coordinates (Angstroms) |           |          |
|---------------|---------------|-------------|-------------------------|-----------|----------|
|               |               |             | X                       | Y         | Z        |
| 1             | 7             | 0           | 0.000000                | 1.402388  | 0.000000 |
| 2             | 7             | 0           | 1.214503                | -0.701194 | 0.000000 |
| 3             | 7             | 0           | -1.214503               | -0.701194 | 0.000000 |
| 4             | 5             | 0           | 0.000000                | -1.461304 | 0.000000 |
| 5             | 1             | 0           | 0.000000                | -2.640482 | 0.000000 |
| 6             | 5             | 0           | -1.265526               | 0.730652  | 0.000000 |
| 7             | 1             | 0           | -2.286725               | 1.320241  | 0.000000 |
| 8             | 5             | 0           | 1.265526                | 0.730652  | 0.000000 |
| 9             | 1             | 0           | 2.286725                | 1.320241  | 0.000000 |
| 10            | 35            | 0           | 0.000000                | 3.255372  | 0.000000 |
| 11            | 35            | 0           | 2.819235                | -1.627686 | 0.000000 |
| 12            | 35            | 0           | -2.819235               | -1.627686 | 0.000000 |

B3LYP/6-311+G\*\*

E = -7963.2456699 a.u.

| Center Number | Atomic Number | Atomic Type | Coordinates (Angstroms) |           |          |
|---------------|---------------|-------------|-------------------------|-----------|----------|
|               |               |             | X                       | Y         | Z        |
| 1             | 7             | 0           | 0.000000                | 1.394739  | 0.000000 |
| 2             | 7             | 0           | 1.207879                | -0.697369 | 0.000000 |
| 3             | 7             | 0           | -1.207879               | -0.697369 | 0.000000 |
| 4             | 5             | 0           | 0.000000                | -1.471385 | 0.000000 |
| 5             | 1             | 0           | 0.000000                | -2.651922 | 0.000000 |
| 6             | 5             | 0           | -1.274257               | 0.735692  | 0.000000 |
| 7             | 1             | 0           | -2.296632               | 1.325961  | 0.000000 |
| 8             | 5             | 0           | 1.274257                | 0.735692  | 0.000000 |
| 9             | 1             | 0           | 2.296632                | 1.325961  | 0.000000 |
| 10            | 35            | 0           | 0.000000                | 3.292964  | 0.000000 |
| 11            | 35            | 0           | 2.851790                | -1.646482 | 0.000000 |
| 12            | 35            | 0           | -2.851790               | -1.646482 | 0.000000 |

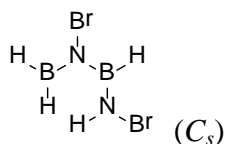

HF/6-311+G\*\*

E = -5305.3959943 a.u.

---

| Center<br>Number | Atomic<br>Number | Atomic<br>Type | Coordinates (Angstroms) |           |          |
|------------------|------------------|----------------|-------------------------|-----------|----------|
|                  |                  |                | X                       | Y         | Z        |
| 1                | 7                | 0              | 0.537425                | -1.239419 | 0.000000 |
| 2                | 7                | 0              | -1.388010               | 0.333039  | 0.000000 |
| 3                | 5                | 0              | 0.000000                | 0.115911  | 0.000000 |
| 4                | 1                | 0              | 0.732356                | 1.041421  | 0.000000 |
| 5                | 5                | 0              | -0.179228               | -2.455959 | 0.000000 |
| 6                | 1                | 0              | 0.378587                | -3.499965 | 0.000000 |
| 7                | 35               | 0              | 2.400367                | -1.344379 | 0.000000 |
| 8                | 35               | 0              | -2.137756               | 2.009481  | 0.000000 |
| 9                | 1                | 0              | -2.083899               | -0.374962 | 0.000000 |
| 10               | 1                | 0              | -1.368193               | -2.400162 | 0.000000 |

---

B3LYP/6-311+G\*\*

E = -5309.9843964 a.u.

---

| Center<br>Number | Atomic<br>Number | Atomic<br>Type | Coordinates (Angstroms) |           |          |
|------------------|------------------|----------------|-------------------------|-----------|----------|
|                  |                  |                | X                       | Y         | Z        |
| 1                | 7                | 0              | 0.512290                | -1.260181 | 0.000000 |
| 2                | 7                | 0              | -1.384541               | 0.330324  | 0.000000 |
| 3                | 5                | 0              | 0.000000                | 0.113898  | 0.000000 |
| 4                | 1                | 0              | 0.742381                | 1.033016  | 0.000000 |
| 5                | 5                | 0              | -0.200576               | -2.469173 | 0.000000 |
| 6                | 1                | 0              | 0.339076                | -3.523834 | 0.000000 |
| 7                | 35               | 0              | 2.428834                | -1.365748 | 0.000000 |
| 8                | 35               | 0              | -2.156939               | 2.038371  | 0.000000 |
| 9                | 1                | 0              | -2.096980               | -0.383851 | 0.000000 |
| 10               | 1                | 0              | -1.392171               | -2.381754 | 0.000000 |

---

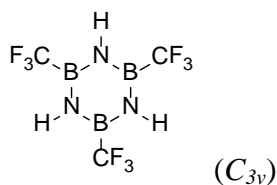

HF/6-311+G\*\*

E = -1248.3842993 a.u.

| Center Number | Atomic Number | Atomic Type | Coordinates (Angstroms) |           |           |
|---------------|---------------|-------------|-------------------------|-----------|-----------|
|               |               |             | X                       | Y         | Z         |
| 1             | 5             | 0           | 0.000000                | 1.423299  | -0.042679 |
| 2             | 5             | 0           | -1.232613               | -0.711650 | -0.042679 |
| 3             | 5             | 0           | 1.232613                | -0.711650 | -0.042679 |
| 4             | 7             | 0           | 0.000000                | -1.412313 | -0.048133 |
| 5             | 1             | 0           | 0.000000                | -2.409014 | -0.077222 |
| 6             | 7             | 0           | -1.223099               | 0.706156  | -0.048133 |
| 7             | 1             | 0           | -2.086267               | 1.204507  | -0.077222 |
| 8             | 7             | 0           | 1.223099                | 0.706156  | -0.048133 |
| 9             | 1             | 0           | 2.086267                | 1.204507  | -0.077222 |
| 10            | 6             | 0           | 0.000000                | 3.037384  | -0.000627 |
| 11            | 6             | 0           | -2.630451               | -1.518692 | -0.000627 |
| 12            | 6             | 0           | 2.630451                | -1.518692 | -0.000627 |
| 13            | 9             | 0           | 0.000000                | 3.478472  | 1.251783  |
| 14            | 9             | 0           | 1.066203                | 3.560622  | -0.590818 |
| 15            | 9             | 0           | -1.066203               | 3.560622  | -0.590818 |
| 16            | 9             | 0           | 3.012445                | -1.739236 | 1.251783  |
| 17            | 9             | 0           | 3.616691                | -0.856952 | -0.590818 |
| 18            | 9             | 0           | 2.550488                | -2.703670 | -0.590818 |
| 19            | 9             | 0           | -3.012445               | -1.739236 | 1.251783  |
| 20            | 9             | 0           | -3.616691               | -0.856952 | -0.590818 |
| 21            | 9             | 0           | -2.550488               | -2.703670 | -0.590818 |

B3LYP/6-311+G\*\*

E = -1254.2188791 a.u.

| Center Number | Atomic Number | Atomic Type | Coordinates (Angstroms) |           |           |
|---------------|---------------|-------------|-------------------------|-----------|-----------|
|               |               |             | X                       | Y         | Z         |
| 1             | 5             | 0           | 0.000000                | 1.431384  | -0.037311 |
| 2             | 5             | 0           | -1.239615               | -0.715692 | -0.037311 |
| 3             | 5             | 0           | 1.239615                | -0.715692 | -0.037311 |
| 4             | 7             | 0           | 0.000000                | -1.413929 | -0.041563 |
| 5             | 1             | 0           | 0.000000                | -2.425658 | -0.072346 |
| 6             | 7             | 0           | -1.224499               | 0.706965  | -0.041563 |
| 7             | 1             | 0           | -2.100682               | 1.212829  | -0.072346 |
| 8             | 7             | 0           | 1.224499                | 0.706965  | -0.041563 |
| 9             | 1             | 0           | 2.100682                | 1.212829  | -0.072346 |
| 10            | 6             | 0           | 0.000000                | 3.039974  | -0.002003 |
| 11            | 6             | 0           | -2.632695               | -1.519987 | -0.002003 |
| 12            | 6             | 0           | 2.632695                | -1.519987 | -0.002003 |
| 13            | 9             | 0           | 0.000000                | 3.502431  | 1.278205  |
| 14            | 9             | 0           | 1.091663                | 3.576403  | -0.607888 |
| 15            | 9             | 0           | -1.091663               | 3.576403  | -0.607888 |
| 16            | 9             | 0           | 3.033194                | -1.751215 | 1.278205  |
| 17            | 9             | 0           | 3.643088                | -0.842794 | -0.607888 |

|    |   |   |           |           |           |
|----|---|---|-----------|-----------|-----------|
| 18 | 9 | 0 | 2.551425  | -2.733610 | -0.607888 |
| 19 | 9 | 0 | -3.033194 | -1.751215 | 1.278205  |
| 20 | 9 | 0 | -3.643088 | -0.842794 | -0.607888 |
| 21 | 9 | 0 | -2.551425 | -2.733610 | -0.607888 |

---

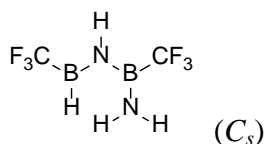

HF/6-311+G\*\* imaginary frequencies:  $-51.297, -27.088 \text{ cm}^{-1}$

E =  $-833.3645315 \text{ a.u.}$

| Center Number | Atomic Number | Atomic Type | Coordinates (Angstroms) |           |           |
|---------------|---------------|-------------|-------------------------|-----------|-----------|
|               |               |             | X                       | Y         | Z         |
| 1             | 5             | 0           | -0.951871               | 1.259023  | 0.000000  |
| 2             | 5             | 0           | -0.556484               | -1.255206 | 0.000000  |
| 3             | 7             | 0           | -0.139744               | 0.123788  | 0.000000  |
| 4             | 1             | 0           | 0.849364                | 0.267556  | 0.000000  |
| 5             | 7             | 0           | -1.871947               | -1.695280 | 0.000000  |
| 6             | 1             | 0           | -2.108851               | -2.660773 | 0.000000  |
| 7             | 6             | 0           | -0.248290               | 2.715698  | 0.000000  |
| 8             | 6             | 0           | 0.607110                | -2.387069 | 0.000000  |
| 9             | 9             | 0           | 0.529699                | -3.177209 | 1.064343  |
| 10            | 9             | 0           | 1.830907                | -1.869247 | 0.000000  |
| 11            | 9             | 0           | 0.529699                | -3.177209 | -1.064343 |
| 12            | 9             | 0           | 0.529699                | 2.881121  | 1.066059  |
| 13            | 9             | 0           | 0.529699                | 2.881121  | -1.066059 |
| 14            | 9             | 0           | -1.113772               | 3.715960  | 0.000000  |
| 15            | 1             | 0           | -2.658531               | -1.088305 | 0.000000  |
| 16            | 1             | 0           | -2.134657               | 1.200283  | 0.000000  |

B3LYP/6-311+G\*\* imaginary frequencies:  $-49.717, -27.079 \text{ cm}^{-1}$

E =  $-837.2991095 \text{ a.u.}$

| Center Number | Atomic Number | Atomic Type | Coordinates (Angstroms) |           |           |
|---------------|---------------|-------------|-------------------------|-----------|-----------|
|               |               |             | X                       | Y         | Z         |
| 1             | 5             | 0           | -0.954045               | 1.259820  | 0.000000  |
| 2             | 5             | 0           | -0.554633               | -1.263835 | 0.000000  |
| 3             | 7             | 0           | -0.139403               | 0.124638  | 0.000000  |
| 4             | 1             | 0           | 0.865799                | 0.267666  | 0.000000  |
| 5             | 7             | 0           | -1.874538               | -1.696041 | 0.000000  |
| 6             | 1             | 0           | -2.124009               | -2.672763 | 0.000000  |
| 7             | 6             | 0           | -0.263280               | 2.715218  | 0.000000  |
| 8             | 6             | 0           | 0.607328                | -2.390159 | 0.000000  |
| 9             | 9             | 0           | 0.535235                | -3.202299 | 1.089277  |
| 10            | 9             | 0           | 1.859668                | -1.855052 | 0.000000  |
| 11            | 9             | 0           | 0.535235                | -3.202299 | -1.089277 |
| 12            | 9             | 0           | 0.535235                | 2.892535  | 1.091908  |
| 13            | 9             | 0           | 0.535235                | 2.892535  | -1.091908 |
| 14            | 9             | 0           | -1.151767               | 3.736608  | 0.000000  |
| 15            | 1             | 0           | -2.665976               | -1.071153 | 0.000000  |
| 16            | 1             | 0           | -2.138716               | 1.187529  | 0.000000  |



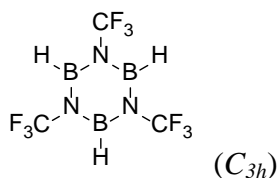

HF/6-311+G\*\*

E = -1248.3452299 a.u.

| Center Number | Atomic Number | Atomic Type | Coordinates (Angstroms) |           |           |
|---------------|---------------|-------------|-------------------------|-----------|-----------|
|               |               |             | X                       | Y         | Z         |
| 1             | 5             | 0           | 0.974606                | 1.079721  | 0.000000  |
| 2             | 1             | 0           | 1.778598                | 1.933886  | 0.000000  |
| 3             | 5             | 0           | 0.447763                | -1.383894 | 0.000000  |
| 4             | 1             | 0           | 0.785495                | -2.507254 | 0.000000  |
| 5             | 5             | 0           | -1.422369               | 0.304173  | 0.000000  |
| 6             | 1             | 0           | -2.564094               | 0.573368  | 0.000000  |
| 7             | 7             | 0           | -0.431989               | 1.354583  | 0.000000  |
| 8             | 7             | 0           | 1.389097                | -0.303178 | 0.000000  |
| 9             | 7             | 0           | -0.957108               | -1.051405 | 0.000000  |
| 10            | 6             | 0           | -0.928582               | 2.679663  | 0.000000  |
| 11            | 6             | 0           | 2.784948                | -0.535656 | 0.000000  |
| 12            | 6             | 0           | -1.856365               | -2.144007 | 0.000000  |
| 13            | 9             | 0           | 3.358426                | 0.000000  | 1.057916  |
| 14            | 9             | 0           | 3.358426                | 0.000000  | -1.057916 |
| 15            | 9             | 0           | 3.075531                | -1.811612 | 0.000000  |
| 16            | 9             | 0           | -1.679213               | -2.908482 | 1.057916  |
| 17            | 9             | 0           | -1.679213               | -2.908482 | -1.057916 |
| 18            | 9             | 0           | -3.106668               | -1.757682 | 0.000000  |
| 19            | 9             | 0           | -1.679213               | 2.908482  | 1.057916  |
| 20            | 9             | 0           | 0.031137                | 3.569294  | 0.000000  |
| 21            | 9             | 0           | -1.679213               | 2.908482  | -1.057916 |

B3LYP/6-311+G\*\*

E = -1254.1610161 a.u.

| Center Number | Atomic Number | Atomic Type | Coordinates (Angstroms) |           |           |
|---------------|---------------|-------------|-------------------------|-----------|-----------|
|               |               |             | X                       | Y         | Z         |
| 1             | 5             | 0           | 0.980405                | 1.082667  | 0.000000  |
| 2             | 1             | 0           | 1.784998                | 1.939920  | 0.000000  |
| 3             | 5             | 0           | 0.447415                | -1.390390 | 0.000000  |
| 4             | 1             | 0           | 0.787522                | -2.515814 | 0.000000  |
| 5             | 5             | 0           | -1.427820               | 0.307722  | 0.000000  |
| 6             | 1             | 0           | -2.572519               | 0.575893  | 0.000000  |
| 7             | 7             | 0           | -0.429685               | 1.355448  | 0.000000  |
| 8             | 7             | 0           | 1.388695                | -0.305606 | 0.000000  |
| 9             | 7             | 0           | -0.959010               | -1.049842 | 0.000000  |
| 10            | 6             | 0           | -0.925077               | 2.697042  | 0.000000  |
| 11            | 6             | 0           | 2.798245                | -0.547381 | 0.000000  |
| 12            | 6             | 0           | -1.873168               | -2.149661 | 0.000000  |
| 13            | 9             | 0           | 3.386075                | 0.000000  | 1.083816  |
| 14            | 9             | 0           | 3.386075                | 0.000000  | -1.083816 |
| 15            | 9             | 0           | 3.092295                | -1.852938 | 0.000000  |
| 16            | 9             | 0           | -1.693037               | -2.932427 | 1.083816  |
| 17            | 9             | 0           | -1.693037               | -2.932427 | -1.083816 |

|    |   |   |           |           |           |
|----|---|---|-----------|-----------|-----------|
| 18 | 9 | 0 | -3.150839 | -1.751537 | 0.000000  |
| 19 | 9 | 0 | -1.693037 | 2.932427  | 1.083816  |
| 20 | 9 | 0 | 0.058544  | 3.604475  | 0.000000  |
| 21 | 9 | 0 | -1.693037 | 2.932427  | -1.083816 |

---

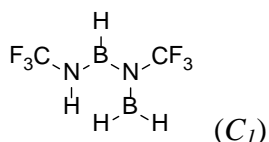

HF/6-311+G\*\*

E = -833.3429929 a.u.

| Center Number | Atomic Number | Atomic Type | Coordinates (Angstroms) |           |           |
|---------------|---------------|-------------|-------------------------|-----------|-----------|
|               |               |             | X                       | Y         | Z         |
| 1             | 5             | 0           | -1.345198               | 2.028898  | 0.003714  |
| 2             | 1             | 0           | -2.399448               | 2.555387  | 0.010745  |
| 3             | 5             | 0           | 0.058974                | -0.100832 | -0.012608 |
| 4             | 1             | 0           | 0.064756                | -1.278915 | -0.015151 |
| 5             | 7             | 0           | 1.292579                | 0.584332  | -0.022163 |
| 6             | 7             | 0           | -1.218575               | 0.608221  | -0.001836 |
| 7             | 6             | 0           | 2.535008                | -0.058129 | -0.001370 |
| 8             | 6             | 0           | -2.358142               | -0.235505 | 0.001031  |
| 9             | 9             | 0           | 3.492064                | 0.833429  | -0.147816 |
| 10            | 9             | 0           | 2.656959                | -0.946467 | -0.963512 |
| 11            | 9             | 0           | 2.762335                | -0.698286 | 1.129097  |
| 12            | 9             | 0           | -2.378242               | -1.016515 | -1.060847 |
| 13            | 9             | 0           | -3.480883               | 0.435900  | 0.010495  |
| 14            | 9             | 0           | -2.365983               | -1.025723 | 1.056277  |
| 15            | 1             | 0           | 1.365336                | 1.575345  | 0.004310  |
| 16            | 1             | 0           | -0.354999               | 2.680734  | 0.001342  |

B3LYP/6-311+G\*\*

E = -837.2650935 a.u.

| Center Number | Atomic Number | Atomic Type | Coordinates (Angstroms) |           |           |
|---------------|---------------|-------------|-------------------------|-----------|-----------|
|               |               |             | X                       | Y         | Z         |
| 1             | 5             | 0           | -1.319386               | 2.024621  | 0.013202  |
| 2             | 1             | 0           | -2.367861               | 2.566789  | 0.028861  |
| 3             | 5             | 0           | 0.051101                | -0.138883 | -0.021726 |
| 4             | 1             | 0           | 0.036050                | -1.317283 | -0.017465 |
| 5             | 7             | 0           | 1.285326                | 0.542907  | -0.050774 |
| 6             | 7             | 0           | -1.217479               | 0.604443  | -0.002062 |
| 7             | 6             | 0           | 2.555595                | -0.061803 | -0.005317 |
| 8             | 6             | 0           | -2.387091               | -0.224335 | 0.001699  |
| 9             | 9             | 0           | 3.461245                | 0.720398  | -0.632609 |
| 10            | 9             | 0           | 2.562148                | -1.268045 | -0.588384 |
| 11            | 9             | 0           | 3.011793                | -0.233326 | 1.260653  |
| 12            | 9             | 0           | -2.423215               | -1.019882 | -1.089119 |
| 13            | 9             | 0           | -3.522206               | 0.482478  | 0.017175  |
| 14            | 9             | 0           | -2.404711               | -1.037370 | 1.079966  |
| 15            | 1             | 0           | 1.334067                | 1.553092  | -0.016677 |
| 16            | 1             | 0           | -0.312279               | 2.655806  | 0.010335  |

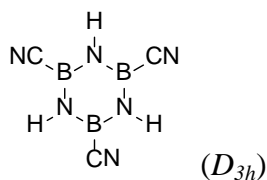

HF/6-311+G\*\*

E = -516.5435175 a.u.

| Center Number | Atomic Number | Atomic Type | Coordinates (Angstroms) |           |          |
|---------------|---------------|-------------|-------------------------|-----------|----------|
|               |               |             | X                       | Y         | Z        |
| 1             | 5             | 0           | 1.235147                | 0.713112  | 0.000000 |
| 2             | 5             | 0           | -1.235147               | 0.713112  | 0.000000 |
| 3             | 5             | 0           | 0.000000                | -1.426225 | 0.000000 |
| 4             | 7             | 0           | 0.000000                | 1.411463  | 0.000000 |
| 5             | 1             | 0           | 0.000000                | 2.407662  | 0.000000 |
| 6             | 7             | 0           | -1.222363               | -0.705732 | 0.000000 |
| 7             | 1             | 0           | -2.085097               | -1.203831 | 0.000000 |
| 8             | 7             | 0           | 1.222363                | -0.705732 | 0.000000 |
| 9             | 1             | 0           | 2.085097                | -1.203831 | 0.000000 |
| 10            | 6             | 0           | -2.590319               | 1.495521  | 0.000000 |
| 11            | 6             | 0           | 0.000000                | -2.991043 | 0.000000 |
| 12            | 6             | 0           | 2.590319                | 1.495521  | 0.000000 |
| 13            | 7             | 0           | -3.570183               | 2.061246  | 0.000000 |
| 14            | 7             | 0           | 0.000000                | -4.122492 | 0.000000 |
| 15            | 7             | 0           | 3.570183                | 2.061246  | 0.000000 |

B3LYP/6-311+G\*\*

E = -519.6020044 a.u.

| Center Number | Atomic Number | Atomic Type | Coordinates (Angstroms) |           |          |
|---------------|---------------|-------------|-------------------------|-----------|----------|
|               |               |             | X                       | Y         | Z        |
| 1             | 5             | 0           | 1.246252                | 0.719524  | 0.000000 |
| 2             | 5             | 0           | 0.000000                | -1.439047 | 0.000000 |
| 3             | 5             | 0           | -1.246252               | 0.719524  | 0.000000 |
| 4             | 7             | 0           | 0.000000                | 1.413970  | 0.000000 |
| 5             | 1             | 0           | 0.000000                | 2.424644  | 0.000000 |
| 6             | 7             | 0           | 1.224534                | -0.706985 | 0.000000 |
| 7             | 1             | 0           | 2.099803                | -1.212322 | 0.000000 |
| 8             | 7             | 0           | -1.224534               | -0.706985 | 0.000000 |
| 9             | 1             | 0           | -2.099803               | -1.212322 | 0.000000 |
| 10            | 6             | 0           | -2.585472               | 1.492723  | 0.000000 |
| 11            | 6             | 0           | 0.000000                | -2.985446 | 0.000000 |
| 12            | 6             | 0           | 2.585472                | 1.492723  | 0.000000 |
| 13            | 7             | 0           | -3.585433               | 2.070051  | 0.000000 |
| 14            | 7             | 0           | 0.000000                | -4.140101 | 0.000000 |
| 15            | 7             | 0           | 3.585433                | 2.070051  | 0.000000 |

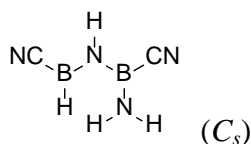

HF/6-311+G\*\*

E = -345.4739209 a.u.

---

| Center Number | Atomic Number | Atomic Type | Coordinates (Angstroms) |           |          |
|---------------|---------------|-------------|-------------------------|-----------|----------|
|               |               |             | X                       | Y         | Z        |
| 1             | 5             | 0           | -1.257185               | 0.901570  | 0.000000 |
| 2             | 1             | 0           | -2.262689               | 0.279136  | 0.000000 |
| 3             | 5             | 0           | 0.292054                | -1.120947 | 0.000000 |
| 4             | 7             | 0           | 0.000000                | 0.292058  | 0.000000 |
| 5             | 1             | 0           | 0.795597                | 0.895108  | 0.000000 |
| 6             | 7             | 0           | -0.657244               | -2.131933 | 0.000000 |
| 7             | 1             | 0           | -0.401549               | -3.092154 | 0.000000 |
| 8             | 1             | 0           | -1.637631               | -1.970685 | 0.000000 |
| 9             | 6             | 0           | -1.357731               | 2.461889  | 0.000000 |
| 10            | 6             | 0           | 1.810032                | -1.537061 | 0.000000 |
| 11            | 7             | 0           | -1.442939               | 3.591041  | 0.000000 |
| 12            | 7             | 0           | 2.902773                | -1.831665 | 0.000000 |

---

B3LYP/6-311+G\*\*

E = -347.5578826 a.u.

---

| Center Number | Atomic Number | Atomic Type | Coordinates (Angstroms) |           |          |
|---------------|---------------|-------------|-------------------------|-----------|----------|
|               |               |             | X                       | Y         | Z        |
| 1             | 5             | 0           | -1.281748               | 0.867792  | 0.000000 |
| 2             | 1             | 0           | -2.257057               | 0.190698  | 0.000000 |
| 3             | 5             | 0           | 0.347433                | -1.112173 | 0.000000 |
| 4             | 7             | 0           | 0.000000                | 0.299696  | 0.000000 |
| 5             | 1             | 0           | 0.786579                | 0.938559  | 0.000000 |
| 6             | 7             | 0           | -0.587862               | -2.143233 | 0.000000 |
| 7             | 1             | 0           | -1.584667               | -1.991073 | 0.000000 |
| 8             | 1             | 0           | -0.316773               | -3.113520 | 0.000000 |
| 9             | 6             | 0           | 1.857166                | -1.482551 | 0.000000 |
| 10            | 6             | 0           | -1.448524               | 2.401244  | 0.000000 |
| 11            | 7             | 0           | 2.980604                | -1.749337 | 0.000000 |
| 12            | 7             | 0           | -1.593936               | 3.547886  | 0.000000 |

---

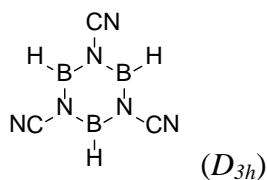

HF/6-311+G\*\*

E = -516.4101955 a.u.

---

| Center<br>Number | Atomic<br>Number | Atomic<br>Type | Coordinates (Angstroms) |           |          |
|------------------|------------------|----------------|-------------------------|-----------|----------|
|                  |                  |                | X                       | Y         | Z        |
| 1                | 5                | 0              | 1.270771                | 0.733680  | 0.000000 |
| 2                | 1                | 0              | 2.288583                | 1.321315  | 0.000000 |
| 3                | 5                | 0              | 0.000000                | -1.467360 | 0.000000 |
| 4                | 1                | 0              | 0.000000                | -2.642628 | 0.000000 |
| 5                | 5                | 0              | -1.270771               | 0.733680  | 0.000000 |
| 6                | 1                | 0              | -2.288584               | 1.321314  | 0.000000 |
| 7                | 7                | 0              | 1.227712                | -0.708819 | 0.000000 |
| 8                | 7                | 0              | -1.227711               | -0.708820 | 0.000000 |
| 9                | 7                | 0              | 0.000000                | 1.417639  | 0.000000 |
| 10               | 6                | 0              | 2.397660                | -1.384290 | 0.000000 |
| 11               | 6                | 0              | -2.397660               | -1.384290 | 0.000000 |
| 12               | 6                | 0              | 0.000000                | 2.768580  | 0.000000 |
| 13               | 7                | 0              | -3.375615               | -1.948912 | 0.000000 |
| 14               | 7                | 0              | 3.375615                | -1.948912 | 0.000000 |
| 15               | 7                | 0              | 0.000000                | 3.897824  | 0.000000 |

---

B3LYP/6-311+G\*\*

E = -519.4683504 a.u.

---

| Center<br>Number | Atomic<br>Number | Atomic<br>Type | Coordinates (Angstroms) |           |          |
|------------------|------------------|----------------|-------------------------|-----------|----------|
|                  |                  |                | X                       | Y         | Z        |
| 1                | 5                | 0              | 1.274422                | 0.735788  | 0.000000 |
| 2                | 1                | 0              | 2.294562                | 1.324766  | 0.000000 |
| 3                | 5                | 0              | -1.274422               | 0.735788  | 0.000000 |
| 4                | 1                | 0              | -2.294562               | 1.324766  | 0.000000 |
| 5                | 5                | 0              | 0.000000                | -1.471576 | 0.000000 |
| 6                | 1                | 0              | 0.000000                | -2.649532 | 0.000000 |
| 7                | 7                | 0              | 0.000000                | 1.421956  | 0.000000 |
| 8                | 7                | 0              | -1.231450               | -0.710978 | 0.000000 |
| 9                | 7                | 0              | 1.231450                | -0.710978 | 0.000000 |
| 10               | 6                | 0              | 0.000000                | 2.779293  | 0.000000 |
| 11               | 6                | 0              | -2.406938               | -1.389646 | 0.000000 |
| 12               | 6                | 0              | 2.406938                | -1.389646 | 0.000000 |
| 13               | 7                | 0              | -3.406292               | -1.966624 | 0.000000 |
| 14               | 7                | 0              | 0.000000                | 3.933248  | 0.000000 |
| 15               | 7                | 0              | 3.406292                | -1.966624 | 0.000000 |

---

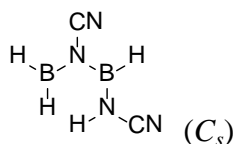

HF/6-311+G\*\*

E = -345.3868317 a.u.

| Center Number | Atomic Number | Atomic Type | Coordinates (Angstroms) |           |          |
|---------------|---------------|-------------|-------------------------|-----------|----------|
|               |               |             | X                       | Y         | Z        |
| 1             | 5             | 0           | 0.492839                | -2.156499 | 0.000000 |
| 2             | 1             | 0           | -0.662190               | -2.419741 | 0.000000 |
| 3             | 1             | 0           | 1.324559                | -2.994151 | 0.000000 |
| 4             | 5             | 0           | 0.000000                | 0.386746  | 0.000000 |
| 5             | 1             | 0           | 0.457270                | 1.471645  | 0.000000 |
| 6             | 7             | 0           | 0.885963                | -0.773502 | 0.000000 |
| 7             | 7             | 0           | -1.409491               | 0.218574  | 0.000000 |
| 8             | 1             | 0           | -1.846990               | -0.676992 | 0.000000 |
| 9             | 6             | 0           | 2.212100                | -0.502689 | 0.000000 |
| 10            | 6             | 0           | -2.267333               | 1.249816  | 0.000000 |
| 11            | 7             | 0           | 3.318921                | -0.275655 | 0.000000 |
| 12            | 7             | 0           | -2.996171               | 2.114189  | 0.000000 |

B3LYP/6-311+G\*\*

E = -347.4703736 a.u.

| Center Number | Atomic Number | Atomic Type | Coordinates (Angstroms) |           |          |
|---------------|---------------|-------------|-------------------------|-----------|----------|
|               |               |             | X                       | Y         | Z        |
| 1             | 5             | 0           | 0.520141                | -2.137518 | 0.000000 |
| 2             | 1             | 0           | -0.639096               | -2.396906 | 0.000000 |
| 3             | 1             | 0           | 1.354289                | -2.975310 | 0.000000 |
| 4             | 5             | 0           | 0.000000                | 0.400469  | 0.000000 |
| 5             | 1             | 0           | 0.439051                | 1.495124  | 0.000000 |
| 6             | 7             | 0           | 0.908468                | -0.754728 | 0.000000 |
| 7             | 7             | 0           | -1.404210               | 0.197051  | 0.000000 |
| 8             | 1             | 0           | -1.803147               | -0.735437 | 0.000000 |
| 9             | 6             | 0           | 2.237120                | -0.464816 | 0.000000 |
| 10            | 6             | 0           | -2.307031               | 1.195391  | 0.000000 |
| 11            | 7             | 0           | 3.364512                | -0.216121 | 0.000000 |
| 12            | 7             | 0           | -3.087675               | 2.047273  | 0.000000 |

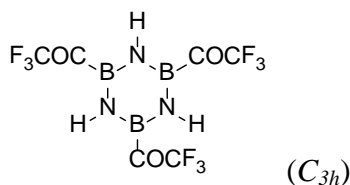

HF/6-311+G\*\*

E = -1586.6285138 a.u.

| Center Number | Atomic Number | Atomic Type | Coordinates (Angstroms) |           |           |
|---------------|---------------|-------------|-------------------------|-----------|-----------|
|               |               |             | X                       | Y         | Z         |
| 1             | 5             | 0           | -0.068863               | 1.423204  | 0.000000  |
| 2             | 7             | 0           | -1.253000               | 0.648267  | 0.000000  |
| 3             | 5             | 0           | -1.198099               | -0.771239 | 0.000000  |
| 4             | 7             | 0           | 0.065084                | -1.409263 | 0.000000  |
| 5             | 5             | 0           | 1.266962                | -0.651964 | 0.000000  |
| 6             | 7             | 0           | 1.187916                | 0.760996  | 0.000000  |
| 7             | 6             | 0           | -0.026160               | 3.049388  | 0.000000  |
| 8             | 1             | 0           | -2.155355               | 1.073760  | 0.000000  |
| 9             | 1             | 0           | 0.147774                | -2.403472 | 0.000000  |
| 10            | 1             | 0           | 2.007581                | 1.329712  | 0.000000  |
| 11            | 8             | 0           | 1.004309                | 3.631013  | 0.000000  |
| 12            | 6             | 0           | 2.653927                | -1.502039 | 0.000000  |
| 13            | 8             | 0           | 2.642394                | -2.685264 | 0.000000  |
| 14            | 6             | 0           | -2.627767               | -1.547349 | 0.000000  |
| 15            | 8             | 0           | -3.646704               | -0.945749 | 0.000000  |
| 16            | 6             | 0           | -1.332350               | 3.863237  | 0.000000  |
| 17            | 6             | 0           | -2.679487               | -3.085468 | 0.000000  |
| 18            | 6             | 0           | 4.011837                | -0.777769 | 0.000000  |
| 19            | 9             | 0           | -1.133865               | 5.147179  | 0.000000  |
| 20            | 9             | 0           | -2.047284               | 3.546001  | 1.064909  |
| 21            | 9             | 0           | -2.047284               | 3.546001  | -1.064909 |
| 22            | 9             | 0           | 4.094569                | 0.000000  | 1.064909  |
| 23            | 9             | 0           | 4.094569                | 0.000000  | -1.064909 |
| 24            | 9             | 0           | 5.024520                | -1.591633 | 0.000000  |
| 25            | 9             | 0           | -2.047284               | -3.546001 | 1.064909  |
| 26            | 9             | 0           | -3.890655               | -3.555545 | 0.000000  |
| 27            | 9             | 0           | -2.047284               | -3.546001 | -1.064909 |

B3LYP/6-311+G\*\*

E = -1594.2517056 a.u.

| Center Number | Atomic Number | Atomic Type | Coordinates (Angstroms) |           |          |
|---------------|---------------|-------------|-------------------------|-----------|----------|
|               |               |             | X                       | Y         | Z        |
| 1             | 5             | 0           | -0.056173               | 1.433790  | 0.000000 |
| 2             | 7             | 0           | -1.248162               | 0.660693  | 0.000000 |
| 3             | 5             | 0           | -1.213612               | -0.765542 | 0.000000 |
| 4             | 7             | 0           | 0.051904                | -1.411287 | 0.000000 |
| 5             | 5             | 0           | 1.269785                | -0.668248 | 0.000000 |
| 6             | 7             | 0           | 1.196258                | 0.750594  | 0.000000 |
| 7             | 6             | 0           | 0.005594                | 3.046549  | 0.000000 |
| 8             | 1             | 0           | -2.161726               | 1.099755  | 0.000000 |
| 9             | 1             | 0           | 0.128447                | -2.421987 | 0.000000 |
| 10            | 1             | 0           | 2.033278                | 1.322232  | 0.000000 |
| 11            | 8             | 0           | 1.059058                | 3.637627  | 0.000000 |



|    |   |   |           |           |           |
|----|---|---|-----------|-----------|-----------|
| 12 | 6 | 0 | 2.635592  | -1.528119 | 0.000000  |
| 13 | 8 | 0 | 2.620749  | -2.735984 | 0.000000  |
| 14 | 6 | 0 | -2.641185 | -1.518430 | 0.000000  |
| 15 | 8 | 0 | -3.679806 | -0.901643 | 0.000000  |
| 16 | 6 | 0 | -1.313575 | 3.873698  | 0.000000  |
| 17 | 6 | 0 | -2.697934 | -3.074438 | 0.000000  |
| 18 | 6 | 0 | 4.011508  | -0.799260 | 0.000000  |
| 19 | 9 | 0 | -1.112642 | 5.185866  | 0.000000  |
| 20 | 9 | 0 | -2.048889 | 3.548780  | 1.090498  |
| 21 | 9 | 0 | -2.048889 | 3.548780  | -1.090498 |
| 22 | 9 | 0 | 4.097778  | 0.000000  | 1.090498  |
| 23 | 9 | 0 | 4.097778  | 0.000000  | -1.090498 |
| 24 | 9 | 0 | 5.047413  | -1.629357 | 0.000000  |
| 25 | 9 | 0 | -2.048889 | -3.548780 | 1.090498  |
| 26 | 9 | 0 | -3.934771 | -3.556509 | 0.000000  |
| 27 | 9 | 0 | -2.048889 | -3.548780 | -1.090498 |

---

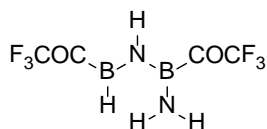

HF/6-311+G\*\* (C<sub>s</sub>)

E = -1058.8622148 a.u.

| Center Number | Atomic Number | Atomic Type | Coordinates (Angstroms) |           |           |
|---------------|---------------|-------------|-------------------------|-----------|-----------|
|               |               |             | X                       | Y         | Z         |
| 1             | 7             | 0           | -2.931368               | -0.455267 | 0.000000  |
| 2             | 5             | 0           | -1.622185               | -0.905641 | 0.000000  |
| 3             | 7             | 0           | -0.457148               | -0.052949 | 0.000000  |
| 4             | 5             | 0           | -0.421556               | 1.339610  | 0.000000  |
| 5             | 1             | 0           | -3.687116               | -1.102489 | 0.000000  |
| 6             | 1             | 0           | 0.441356                | -0.492277 | 0.000000  |
| 7             | 6             | 0           | 1.062749                | 2.011338  | 0.000000  |
| 8             | 8             | 0           | 2.050212                | 1.358500  | 0.000000  |
| 9             | 6             | 0           | -1.487025               | -2.537338 | 0.000000  |
| 10            | 8             | 0           | -2.445385               | -3.231899 | 0.000000  |
| 11            | 6             | 0           | -0.104147               | -3.216156 | 0.000000  |
| 12            | 6             | 0           | 1.184653                | 3.544013  | 0.000000  |
| 13            | 9             | 0           | 0.577328                | 4.031625  | 1.066212  |
| 14            | 9             | 0           | 0.577328                | 4.031625  | -1.066212 |
| 15            | 9             | 0           | 2.418068                | 3.960532  | 0.000000  |
| 16            | 9             | 0           | 0.577328                | -2.829971 | 1.064870  |
| 17            | 9             | 0           | -0.171263               | -4.514347 | 0.000000  |
| 18            | 9             | 0           | 0.577328                | -2.829971 | -1.064870 |
| 19            | 1             | 0           | -3.200885               | 0.500576  | 0.000000  |
| 20            | 1             | 0           | -1.396089               | 2.012489  | 0.000000  |

B3LYP/6-311+G\*\* (C<sub>i</sub>)

E = -1063.9889954 a.u.

| Center Number | Atomic Number | Atomic Type | Coordinates (Angstroms) |           |           |
|---------------|---------------|-------------|-------------------------|-----------|-----------|
|               |               |             | X                       | Y         | Z         |
| 1             | 5             | 0           | -1.345985               | 1.291703  | -0.030676 |
| 2             | 7             | 0           | -0.179517               | 0.427189  | -0.064245 |
| 3             | 5             | 0           | 1.165399                | 0.792270  | 0.016703  |
| 4             | 7             | 0           | -1.289302               | 2.676998  | 0.032772  |
| 5             | 6             | 0           | -2.860401               | 0.702982  | -0.066759 |
| 6             | 1             | 0           | -0.338744               | -0.572324 | -0.167245 |
| 7             | 1             | 0           | -2.141312               | 3.219375  | 0.042642  |
| 8             | 8             | 0           | -3.822645               | 1.428275  | -0.153154 |
| 9             | 6             | 0           | 2.221312                | -0.430350 | -0.067235 |
| 10            | 8             | 0           | 1.874842                | -1.581543 | -0.195492 |
| 11            | 6             | 0           | -3.110998               | -0.831291 | 0.039843  |
| 12            | 6             | 0           | 3.739291                | -0.109279 | 0.020079  |
| 13            | 9             | 0           | -4.390984               | -1.166618 | -0.068963 |
| 14            | 9             | 0           | -2.648114               | -1.278035 | 1.230890  |
| 15            | 9             | 0           | -2.415213               | -1.477894 | -0.929738 |
| 16            | 9             | 0           | 4.000669                | 0.503894  | 1.197538  |
| 17            | 9             | 0           | 4.515840                | -1.185852 | -0.075293 |
| 18            | 9             | 0           | 4.074762                | 0.749103  | -0.970830 |
| 19            | 1             | 0           | -0.438688               | 3.217157  | 0.058263  |

20 1 0 1.517966 1.919001 0.137694

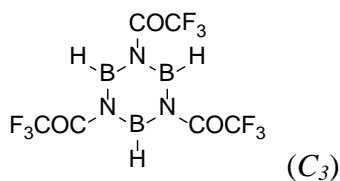

HF/6-311+G\*\*

E = -1586.5897268 a.u.

| Center Number | Atomic Number | Atomic Type | Coordinates (Angstroms) |           |           |
|---------------|---------------|-------------|-------------------------|-----------|-----------|
|               |               |             | X                       | Y         | Z         |
| 1             | 7             | 0           | 0.398154                | 1.374247  | -0.349197 |
| 2             | 7             | 0           | -1.389210               | -0.342312 | -0.349197 |
| 3             | 7             | 0           | 0.991055                | -1.031935 | -0.349197 |
| 4             | 5             | 0           | -1.007003               | 1.053000  | -0.359420 |
| 5             | 1             | 0           | -1.827584               | 1.886145  | -0.372673 |
| 6             | 5             | 0           | -0.408423               | -1.398590 | -0.359420 |
| 7             | 1             | 0           | -0.719658               | -2.525807 | -0.372673 |
| 8             | 5             | 0           | 1.415426                | 0.345590  | -0.359420 |
| 9             | 1             | 0           | 2.547242                | 0.639661  | -0.372673 |
| 10            | 6             | 0           | 0.857777                | 2.698824  | -0.410316 |
| 11            | 8             | 0           | 1.862534                | 3.023969  | -0.920098 |
| 12            | 6             | 0           | 0.000000                | 3.793750  | 0.272968  |
| 13            | 9             | 0           | -0.562401               | 3.348689  | 1.375917  |
| 14            | 9             | 0           | -0.945969               | 4.211813  | -0.536918 |
| 15            | 9             | 0           | 0.752353                | 4.809064  | 0.583115  |
| 16            | 6             | 0           | 1.908362                | -2.092269 | -0.410316 |
| 17            | 8             | 0           | 1.687567                | -3.124986 | -0.920098 |
| 18            | 6             | 0           | -2.766139               | -0.606555 | -0.410316 |
| 19            | 8             | 0           | -3.550101               | 0.101018  | -0.920098 |
| 20            | 6             | 0           | 3.285484                | -1.896875 | 0.272968  |
| 21            | 6             | 0           | -3.285484               | -1.896875 | 0.272968  |
| 22            | 9             | 0           | -3.174552               | -2.925139 | -0.536918 |
| 23            | 9             | 0           | -2.618849               | -2.161398 | 1.375917  |
| 24            | 9             | 0           | -4.540948               | -1.752975 | 0.583115  |
| 25            | 9             | 0           | 4.120521                | -1.286674 | -0.536918 |
| 26            | 9             | 0           | 3.788595                | -3.056089 | 0.583115  |
| 27            | 9             | 0           | 3.181250                | -1.187291 | 1.375917  |

B3LYP/6-311+G\*\*

E = -1594.2066389 a.u.

| Center Number | Atomic Number | Atomic Type | Coordinates (Angstroms) |           |           |
|---------------|---------------|-------------|-------------------------|-----------|-----------|
|               |               |             | X                       | Y         | Z         |
| 1             | 7             | 0           | 0.407157                | 1.373515  | -0.342694 |
| 2             | 7             | 0           | -1.393077               | -0.334149 | -0.342694 |
| 3             | 7             | 0           | 0.985920                | -1.039366 | -0.342694 |
| 4             | 5             | 0           | -1.003613               | 1.064020  | -0.346881 |
| 5             | 1             | 0           | -1.824015               | 1.901999  | -0.353765 |
| 6             | 5             | 0           | -0.419662               | -1.401164 | -0.346881 |
| 7             | 1             | 0           | -0.735172               | -2.530643 | -0.353765 |

|    |   |   |           |           |           |
|----|---|---|-----------|-----------|-----------|
| 8  | 5 | 0 | 1.423275  | 0.337144  | -0.346881 |
| 9  | 1 | 0 | 2.559187  | 0.628643  | -0.353765 |
| 10 | 6 | 0 | 0.882542  | 2.710932  | -0.403168 |
| 11 | 8 | 0 | 1.922001  | 3.029223  | -0.899858 |
| 12 | 6 | 0 | 0.000000  | 3.817752  | 0.263867  |
| 13 | 9 | 0 | -0.567541 | 3.381431  | 1.406338  |
| 14 | 9 | 0 | -0.978392 | 4.216974  | -0.570012 |
| 15 | 9 | 0 | 0.754619  | 4.873986  | 0.554973  |
| 16 | 6 | 0 | 1.906465  | -2.119770 | -0.403168 |
| 17 | 8 | 0 | 1.662384  | -3.179113 | -0.899858 |
| 18 | 6 | 0 | -2.789007 | -0.591162 | -0.403168 |
| 19 | 8 | 0 | -3.584385 | 0.149890  | -0.899858 |
| 20 | 6 | 0 | 3.306270  | -1.908876 | 0.263867  |
| 21 | 6 | 0 | -3.306270 | -1.908876 | 0.263867  |
| 22 | 9 | 0 | -3.162811 | -2.955799 | -0.570012 |
| 23 | 9 | 0 | -2.644634 | -2.182220 | 1.406338  |
| 24 | 9 | 0 | -4.598305 | -1.783474 | 0.554973  |
| 25 | 9 | 0 | 4.141203  | -1.261175 | -0.570012 |
| 26 | 9 | 0 | 3.843686  | -3.090512 | 0.554973  |
| 27 | 9 | 0 | 3.212175  | -1.199211 | 1.406338  |

---

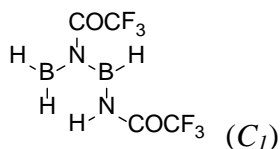

HF/6-311+G\*\*

E = -1058.8466269 a.u.

| Center Number | Atomic Number | Atomic Type | Coordinates (Angstroms) |           |           |
|---------------|---------------|-------------|-------------------------|-----------|-----------|
|               |               |             | X                       | Y         | Z         |
| 1             | 7             | 0           | -1.394865               | 1.085138  | -0.169945 |
| 2             | 7             | 0           | 1.072708                | 0.640113  | -0.221651 |
| 3             | 5             | 0           | -0.311885               | 0.160743  | -0.153870 |
| 4             | 1             | 0           | -0.506578               | -0.989316 | -0.055337 |
| 5             | 5             | 0           | 1.455558                | 2.020340  | -0.142057 |
| 6             | 1             | 0           | 2.584244                | 2.339712  | -0.249601 |
| 7             | 6             | 0           | -2.749784               | 0.885021  | -0.063785 |
| 8             | 8             | 0           | -3.533384               | 1.764419  | -0.109258 |
| 9             | 6             | 0           | -3.253234               | -0.562694 | 0.126174  |
| 10            | 9             | 0           | -2.744498               | -1.092873 | 1.218552  |
| 11            | 9             | 0           | -2.911119               | -1.313842 | -0.897388 |
| 12            | 9             | 0           | -4.548576               | -0.578904 | 0.230654  |
| 13            | 6             | 0           | 2.024596                | -0.366951 | -0.444101 |
| 14            | 8             | 0           | 1.818236                | -1.341930 | -1.063616 |
| 15            | 6             | 0           | 3.427087                | -0.200861 | 0.195419  |
| 16            | 9             | 0           | 4.224384                | 0.472263  | -0.603576 |
| 17            | 9             | 0           | 3.368593                | 0.427286  | 1.349524  |
| 18            | 9             | 0           | 3.953469                | -1.374403 | 0.402105  |
| 19            | 1             | 0           | 0.619588                | 2.844556  | 0.006285  |
| 20            | 1             | 0           | -1.211604               | 2.060120  | -0.278627 |

B3LYP/6-311+G\*\*

E = -1063.9698734 a.u.

| Center Number | Atomic Number | Atomic Type | Coordinates (Angstroms) |           |           |
|---------------|---------------|-------------|-------------------------|-----------|-----------|
|               |               |             | X                       | Y         | Z         |
| 1             | 7             | 0           | -1.395553               | 1.087480  | -0.175750 |
| 2             | 7             | 0           | 1.069669                | 0.628614  | -0.221126 |
| 3             | 5             | 0           | -0.323318               | 0.151253  | -0.158562 |
| 4             | 1             | 0           | -0.527499               | -1.000500 | -0.062758 |
| 5             | 5             | 0           | 1.450481                | 2.009760  | -0.148504 |
| 6             | 1             | 0           | 2.581581                | 2.332022  | -0.236096 |
| 7             | 6             | 0           | -2.764947               | 0.901253  | -0.067696 |
| 8             | 8             | 0           | -3.555228               | 1.806594  | -0.113367 |
| 9             | 6             | 0           | -3.275831               | -0.559595 | 0.125507  |
| 10            | 9             | 0           | -2.757084               | -1.108116 | 1.244081  |
| 11            | 9             | 0           | -2.933054               | -1.336365 | -0.921133 |
| 12            | 9             | 0           | -4.600129               | -0.570217 | 0.234914  |
| 13            | 6             | 0           | 2.031073                | -0.396723 | -0.426278 |
| 14            | 8             | 0           | 1.805769                | -1.415728 | -1.010772 |
| 15            | 6             | 0           | 3.456300                | -0.188372 | 0.186960  |
| 16            | 9             | 0           | 4.239537                | 0.521971  | -0.647191 |
| 17            | 9             | 0           | 3.408009                | 0.452316  | 1.371650  |
| 18            | 9             | 0           | 4.031532                | -1.373278 | 0.384843  |
| 19            | 1             | 0           | 0.600993                | 2.830322  | -0.030874 |

20 1 0 -1.192887 2.077323 -0.279140

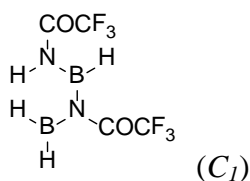

HF/6-311+G\*\*

E = -1058.8479135 a.u.

| Center Number | Atomic Number | Atomic Type | Coordinates (Angstroms) |           |           |
|---------------|---------------|-------------|-------------------------|-----------|-----------|
|               |               |             | X                       | Y         | Z         |
| 1             | 7             | 0           | -1.256573               | 1.070502  | -0.050325 |
| 2             | 7             | 0           | 1.138132                | 0.320030  | 0.003361  |
| 3             | 5             | 0           | -0.240603               | 0.046123  | -0.250970 |
| 4             | 1             | 0           | -0.538786               | -1.012754 | -0.656419 |
| 5             | 5             | 0           | -0.971538               | 2.441407  | 0.286506  |
| 6             | 1             | 0           | -1.854309               | 3.205668  | 0.445999  |
| 7             | 6             | 0           | -2.606801               | 0.758343  | -0.286585 |
| 8             | 8             | 0           | -3.382352               | 1.493254  | -0.769499 |
| 9             | 6             | 0           | -3.115634               | -0.636276 | 0.160845  |
| 10            | 9             | 0           | -2.433458               | -1.101757 | 1.185119  |
| 11            | 9             | 0           | -3.022684               | -1.498802 | -0.824690 |
| 12            | 9             | 0           | -4.367068               | -0.551470 | 0.515418  |
| 13            | 6             | 0           | 2.143962                | -0.593803 | -0.188156 |
| 14            | 8             | 0           | 2.021782                | -1.709366 | -0.539320 |
| 15            | 6             | 0           | 3.553499                | -0.017717 | 0.065128  |
| 16            | 9             | 0           | 3.906917                | 0.741190  | -0.951625 |
| 17            | 9             | 0           | 3.565203                | 0.739797  | 1.147166  |
| 18            | 9             | 0           | 4.432997                | -0.960295 | 0.210873  |
| 19            | 1             | 0           | 1.424401                | 1.207079  | 0.351990  |
| 20            | 1             | 0           | 0.155736                | 2.776280  | 0.432300  |

B3LYP/6-311+G\*\*

E = -1063.9704158 a.u.

| Center Number | Atomic Number | Atomic Type | Coordinates (Angstroms) |           |           |
|---------------|---------------|-------------|-------------------------|-----------|-----------|
|               |               |             | X                       | Y         | Z         |
| 1             | 7             | 0           | -1.257358               | 1.078785  | -0.048257 |
| 2             | 7             | 0           | 1.129689                | 0.308584  | 0.014834  |
| 3             | 5             | 0           | -0.250057               | 0.031605  | -0.227579 |
| 4             | 1             | 0           | -0.553808               | -1.037085 | -0.610365 |
| 5             | 5             | 0           | -0.949319               | 2.445914  | 0.282206  |
| 6             | 1             | 0           | -1.823251               | 3.225221  | 0.432827  |
| 7             | 6             | 0           | -2.631214               | 0.781397  | -0.274695 |
| 8             | 8             | 0           | -3.420630               | 1.554998  | -0.728800 |
| 9             | 6             | 0           | -3.137555               | -0.638068 | 0.148033  |
| 10            | 9             | 0           | -2.461943               | -1.120101 | 1.210822  |
| 11            | 9             | 0           | -3.006745               | -1.511059 | -0.867245 |
| 12            | 9             | 0           | -4.427076               | -0.572123 | 0.476891  |

|    |   |   |          |           |           |
|----|---|---|----------|-----------|-----------|
| 13 | 6 | 0 | 2.150466 | -0.612328 | -0.161397 |
| 14 | 8 | 0 | 2.032066 | -1.760762 | -0.486026 |
| 15 | 6 | 0 | 3.573172 | -0.011197 | 0.057158  |
| 16 | 9 | 0 | 4.017839 | 0.528490  | -1.095017 |
| 17 | 9 | 0 | 3.559131 | 0.978378  | 0.985389  |
| 18 | 9 | 0 | 4.434161 | -0.941048 | 0.452427  |
| 19 | 1 | 0 | 1.421335 | 1.221202  | 0.342441  |
| 20 | 1 | 0 | 0.187270 | 2.755951  | 0.430520  |

---

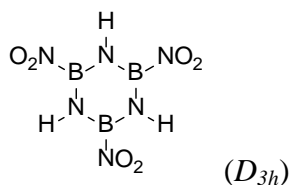

HF/6-311+G\*\*

E = -851.8875584 a.u.

| Center Number | Atomic Number | Atomic Type | Coordinates (Angstroms) |           |          |
|---------------|---------------|-------------|-------------------------|-----------|----------|
|               |               |             | X                       | Y         | Z        |
| 1             | 5             | 0           | 0.000000                | 1.394703  | 0.000000 |
| 2             | 7             | 0           | 1.226455                | 0.708094  | 0.000000 |
| 3             | 5             | 0           | 1.207848                | -0.697351 | 0.000000 |
| 4             | 7             | 0           | 0.000000                | -1.416188 | 0.000000 |
| 5             | 5             | 0           | -1.207848               | -0.697351 | 0.000000 |
| 6             | 7             | 0           | -1.226455               | 0.708094  | 0.000000 |
| 7             | 1             | 0           | 2.092250                | 1.207961  | 0.000000 |
| 8             | 1             | 0           | 0.000000                | -2.415922 | 0.000000 |
| 9             | 1             | 0           | -2.092250               | 1.207961  | 0.000000 |
| 10            | 7             | 0           | 2.556032                | -1.475726 | 0.000000 |
| 11            | 8             | 0           | 3.557819                | -0.833316 | 0.000000 |
| 12            | 8             | 0           | 2.500583                | -2.664504 | 0.000000 |
| 13            | 7             | 0           | 0.000000                | 2.951451  | 0.000000 |
| 14            | 8             | 0           | 1.057237                | 3.497820  | 0.000000 |
| 15            | 8             | 0           | -1.057237               | 3.497820  | 0.000000 |
| 16            | 7             | 0           | -2.556032               | -1.475726 | 0.000000 |
| 17            | 8             | 0           | -2.500583               | -2.664504 | 0.000000 |
| 18            | 8             | 0           | -3.557819               | -0.833316 | 0.000000 |

B3LYP/6-311+G\*\*

E = -856.5211549 a.u.

| Center Number | Atomic Number | Atomic Type | Coordinates (Angstroms) |           |          |
|---------------|---------------|-------------|-------------------------|-----------|----------|
|               |               |             | X                       | Y         | Z        |
| 1             | 5             | 0           | 0.000000                | 1.407383  | 0.000000 |
| 2             | 7             | 0           | 1.228015                | 0.708995  | 0.000000 |
| 3             | 5             | 0           | 1.218830                | -0.703692 | 0.000000 |
| 4             | 7             | 0           | 0.000000                | -1.417990 | 0.000000 |
| 5             | 5             | 0           | -1.218830               | -0.703692 | 0.000000 |
| 6             | 7             | 0           | -1.228015               | 0.708995  | 0.000000 |
| 7             | 1             | 0           | 2.107052                | 1.216507  | 0.000000 |
| 8             | 1             | 0           | 0.000000                | -2.433014 | 0.000000 |
| 9             | 1             | 0           | -2.107052               | 1.216507  | 0.000000 |
| 10            | 7             | 0           | 2.562440                | -1.479426 | 0.000000 |
| 11            | 8             | 0           | 3.599644                | -0.820038 | 0.000000 |
| 12            | 8             | 0           | 2.509995                | -2.707364 | 0.000000 |
| 13            | 7             | 0           | 0.000000                | 2.958851  | 0.000000 |
| 14            | 8             | 0           | 1.089648                | 3.527402  | 0.000000 |
| 15            | 8             | 0           | -1.089648               | 3.527402  | 0.000000 |
| 16            | 7             | 0           | -2.562440               | -1.479426 | 0.000000 |
| 17            | 8             | 0           | -2.509995               | -2.707364 | 0.000000 |
| 18            | 8             | 0           | -3.599644               | -0.820038 | 0.000000 |



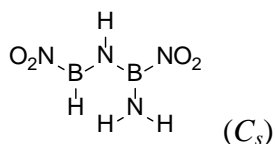

HF/6-311+G\*\* imaginary frequency:  $-17.681 \text{ cm}^{-1}$

E =  $-569.0378169 \text{ a.u.}$

---

| Center Number | Atomic Number | Atomic Type | Coordinates (Angstroms) |           |          |
|---------------|---------------|-------------|-------------------------|-----------|----------|
|               |               |             | X                       | Y         | Z        |
| 1             | 5             | 0           | 0.561467                | 1.446516  | 0.000000 |
| 2             | 7             | 0           | 0.000000                | 0.186173  | 0.000000 |
| 3             | 5             | 0           | 0.689805                | -1.063934 | 0.000000 |
| 4             | 7             | 0           | 2.037221                | -1.319784 | 0.000000 |
| 5             | 1             | 0           | -1.002718               | 0.134966  | 0.000000 |
| 6             | 1             | 0           | 2.372291                | -2.257638 | 0.000000 |
| 7             | 7             | 0           | -0.434367               | 2.654075  | 0.000000 |
| 8             | 8             | 0           | 0.039616                | 3.744644  | 0.000000 |
| 9             | 8             | 0           | -1.604058               | 2.417608  | 0.000000 |
| 10            | 7             | 0           | -0.240810               | -2.335086 | 0.000000 |
| 11            | 8             | 0           | -1.418152               | -2.156129 | 0.000000 |
| 12            | 8             | 0           | 0.282017                | -3.404859 | 0.000000 |
| 13            | 1             | 0           | 1.704589                | 1.719207  | 0.000000 |
| 14            | 1             | 0           | 2.739783                | -0.617190 | 0.000000 |

---

B3LYP/6-311+G\*\* imaginary frequency:  $-16.478 \text{ cm}^{-1}$

E =  $-572.1711302 \text{ a.u.}$

---

| Center Number | Atomic Number | Atomic Type | Coordinates (Angstroms) |           |          |
|---------------|---------------|-------------|-------------------------|-----------|----------|
|               |               |             | X                       | Y         | Z        |
| 1             | 5             | 0           | 0.792432                | -1.002726 | 0.000000 |
| 2             | 7             | 0           | 2.162703                | -1.139675 | 0.000000 |
| 3             | 5             | 0           | 0.437271                | 1.508281  | 0.000000 |
| 4             | 7             | 0           | 0.000000                | 0.194854  | 0.000000 |
| 5             | 1             | 0           | 2.574408                | -2.062669 | 0.000000 |
| 6             | 1             | 0           | -1.011303               | 0.052270  | 0.000000 |
| 7             | 7             | 0           | -0.021477               | -2.345745 | 0.000000 |
| 8             | 8             | 0           | 0.606678                | -3.401982 | 0.000000 |
| 9             | 8             | 0           | -1.248483               | -2.269252 | 0.000000 |
| 10            | 7             | 0           | -0.671355               | 2.604215  | 0.000000 |
| 11            | 8             | 0           | -0.305547               | 3.776909  | 0.000000 |
| 12            | 8             | 0           | -1.849249               | 2.241777  | 0.000000 |
| 13            | 1             | 0           | 1.556821                | 1.879032  | 0.000000 |
| 14            | 1             | 0           | 2.815279                | -0.371568 | 0.000000 |

---

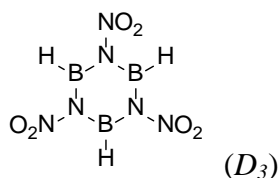

HF/6-311+G\*\*

E = -851.6743145 a.u.

| Center Number | Atomic Number | Atomic Type | Coordinates (Angstroms) |           |           |
|---------------|---------------|-------------|-------------------------|-----------|-----------|
|               |               |             | X                       | Y         | Z         |
| 1             | 5             | 0           | -1.283143               | 0.740823  | 0.000000  |
| 2             | 1             | 0           | -2.291707               | 1.323118  | 0.000000  |
| 3             | 5             | 0           | 0.000000                | -1.481646 | 0.000000  |
| 4             | 1             | 0           | 0.000000                | -2.646236 | 0.000000  |
| 5             | 5             | 0           | 1.283143                | 0.740823  | 0.000000  |
| 6             | 1             | 0           | 2.291707                | 1.323118  | 0.000000  |
| 7             | 7             | 0           | 0.000000                | 1.402596  | 0.000000  |
| 8             | 7             | 0           | -1.214684               | -0.701298 | 0.000000  |
| 9             | 7             | 0           | 1.214684                | -0.701298 | 0.000000  |
| 10            | 7             | 0           | -2.428308               | -1.401984 | 0.000000  |
| 11            | 8             | 0           | -3.338444               | -0.882093 | 0.538454  |
| 12            | 8             | 0           | -2.433137               | -2.450131 | -0.538454 |
| 13            | 7             | 0           | 2.428308                | -1.401984 | 0.000000  |
| 14            | 8             | 0           | 3.338444                | -0.882093 | -0.538454 |
| 15            | 8             | 0           | 2.433137                | -2.450131 | 0.538454  |
| 16            | 7             | 0           | 0.000000                | 2.803968  | 0.000000  |
| 17            | 8             | 0           | -0.905307               | 3.332224  | -0.538454 |
| 18            | 8             | 0           | 0.905307                | 3.332224  | 0.538454  |

B3LYP/6-311+G\*\*

E = -856.3149005 a.u.

| Center Number | Atomic Number | Atomic Type | Coordinates (Angstroms) |           |           |
|---------------|---------------|-------------|-------------------------|-----------|-----------|
|               |               |             | X                       | Y         | Z         |
| 1             | 5             | 0           | -1.281578               | 0.739920  | 0.000000  |
| 2             | 1             | 0           | -2.295855               | 1.325513  | 0.000000  |
| 3             | 5             | 0           | 0.000000                | -1.479839 | 0.000000  |
| 4             | 1             | 0           | 0.000000                | -2.651025 | 0.000000  |
| 5             | 5             | 0           | 1.281578                | 0.739920  | 0.000000  |
| 6             | 1             | 0           | 2.295855                | 1.325513  | 0.000000  |
| 7             | 7             | 0           | 0.000000                | 1.398855  | 0.000000  |
| 8             | 7             | 0           | -1.211444               | -0.699427 | 0.000000  |
| 9             | 7             | 0           | 1.211444                | -0.699427 | 0.000000  |
| 10            | 7             | 0           | -2.482667               | -1.433369 | 0.000000  |
| 11            | 8             | 0           | -3.419517               | -0.871087 | 0.514793  |
| 12            | 8             | 0           | -2.464142               | -2.525845 | -0.514793 |
| 13            | 7             | 0           | 2.482667                | -1.433369 | 0.000000  |
| 14            | 8             | 0           | 3.419517                | -0.871087 | -0.514793 |
| 15            | 8             | 0           | 2.464142                | -2.525845 | 0.514793  |
| 16            | 7             | 0           | 0.000000                | 2.866737  | 0.000000  |
| 17            | 8             | 0           | -0.955375               | 3.396932  | -0.514793 |
| 18            | 8             | 0           | 0.955375                | 3.396932  | 0.514793  |

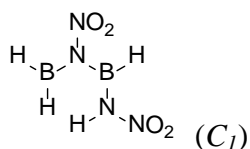

HF/6-311+G\*\*

E = -568.9040309 a.u.

| Center Number | Atomic Number | Atomic Type | Coordinates (Angstroms) |           |           |
|---------------|---------------|-------------|-------------------------|-----------|-----------|
|               |               |             | X                       | Y         | Z         |
| 1             | 5             | 0           | -0.095293               | -0.296804 | -0.078492 |
| 2             | 1             | 0           | -0.104524               | -1.438543 | -0.316832 |
| 3             | 5             | 0           | 1.338827                | 1.867657  | 0.081927  |
| 4             | 1             | 0           | 0.360048                | 2.531968  | 0.066078  |
| 5             | 1             | 0           | 2.412223                | 2.334588  | 0.181980  |
| 6             | 7             | 0           | 1.157686                | 0.446436  | 0.016875  |
| 7             | 7             | 0           | -1.309855               | 0.429588  | 0.083502  |
| 8             | 1             | 0           | -1.395571               | 1.391790  | 0.322082  |
| 9             | 7             | 0           | 2.314375                | -0.350450 | 0.022743  |
| 10            | 8             | 0           | 3.257288                | 0.071400  | -0.544777 |
| 11            | 8             | 0           | 2.242903                | -1.376591 | 0.601740  |
| 12            | 7             | 0           | -2.555865               | -0.120065 | -0.038151 |
| 13            | 8             | 0           | -3.454864               | 0.623292  | 0.174119  |
| 14            | 8             | 0           | -2.637106               | -1.257181 | -0.339241 |

B3LYP/6-311+G\*\*

E = -572.039589 a.u.

| Center Number | Atomic Number | Atomic Type | Coordinates (Angstroms) |           |           |
|---------------|---------------|-------------|-------------------------|-----------|-----------|
|               |               |             | X                       | Y         | Z         |
| 1             | 5             | 0           | 0.099877                | -0.269522 | 0.051531  |
| 2             | 1             | 0           | 0.110621                | -1.425468 | 0.246085  |
| 3             | 5             | 0           | -1.342037               | 1.883586  | -0.130153 |
| 4             | 1             | 0           | -0.361953               | 2.553113  | -0.168503 |
| 5             | 1             | 0           | -2.424529               | 2.345715  | -0.196621 |
| 6             | 7             | 0           | -1.151581               | 0.477393  | -0.031107 |
| 7             | 7             | 0           | 1.316033                | 0.450324  | -0.070309 |
| 8             | 1             | 0           | 1.417287                | 1.440122  | -0.253944 |
| 9             | 7             | 0           | -2.367684               | -0.364511 | -0.008933 |
| 10            | 8             | 0           | -3.334813               | 0.107836  | 0.537789  |
| 11            | 8             | 0           | -2.272204               | -1.442514 | -0.548301 |
| 12            | 7             | 0           | 2.600275                | -0.130887 | 0.042940  |
| 13            | 8             | 0           | 3.523669                | 0.648960  | -0.114974 |
| 14            | 8             | 0           | 2.669607                | -1.315535 | 0.280230  |

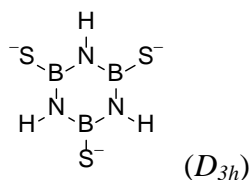

HF/6-311+G\*\*

E = -1431.9819317 a.u.

---

| Center Number | Atomic Number | Atomic Type | Coordinates (Angstroms) |           |          |
|---------------|---------------|-------------|-------------------------|-----------|----------|
|               |               |             | X                       | Y         | Z        |
| 1             | 5             | 0           | 1.283633                | 0.741106  | 0.000000 |
| 2             | 5             | 0           | -1.283633               | 0.741106  | 0.000000 |
| 3             | 5             | 0           | 0.000000                | -1.482212 | 0.000000 |
| 4             | 7             | 0           | 0.000000                | 1.405310  | 0.000000 |
| 5             | 1             | 0           | 0.000000                | 2.397693  | 0.000000 |
| 6             | 7             | 0           | -1.217034               | -0.702655 | 0.000000 |
| 7             | 1             | 0           | -2.076463               | -1.198846 | 0.000000 |
| 8             | 7             | 0           | 1.217034                | -0.702655 | 0.000000 |
| 9             | 1             | 0           | 2.076463                | -1.198846 | 0.000000 |
| 10            | 16            | 0           | -2.893310               | 1.670453  | 0.000000 |
| 11            | 16            | 0           | 0.000000                | -3.340907 | 0.000000 |
| 12            | 16            | 0           | 2.893310                | 1.670453  | 0.000000 |

---

B3LYP/6-311+G\*\*

E = -1435.5558622 a.u.

---

| Center Number | Atomic Number | Atomic Type | Coordinates (Angstroms) |           |          |
|---------------|---------------|-------------|-------------------------|-----------|----------|
|               |               |             | X                       | Y         | Z        |
| 1             | 5             | 0           | 1.292824                | 0.746412  | 0.000000 |
| 2             | 5             | 0           | -1.292824               | 0.746412  | 0.000000 |
| 3             | 5             | 0           | 0.000000                | -1.492824 | 0.000000 |
| 4             | 7             | 0           | 0.000000                | 1.408912  | 0.000000 |
| 5             | 1             | 0           | 0.000000                | 2.416817  | 0.000000 |
| 6             | 7             | 0           | -1.220153               | -0.704456 | 0.000000 |
| 7             | 1             | 0           | -2.093025               | -1.208408 | 0.000000 |
| 8             | 7             | 0           | 1.220153                | -0.704456 | 0.000000 |
| 9             | 1             | 0           | 2.093025                | -1.208408 | 0.000000 |
| 10            | 16            | 0           | -2.899957               | 1.674291  | 0.000000 |
| 11            | 16            | 0           | 0.000000                | -3.348582 | 0.000000 |
| 12            | 16            | 0           | 2.899957                | 1.674291  | 0.000000 |

---

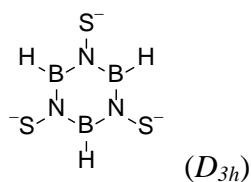

HF/6-311+G\*\*

E = -1431.743253 a.u.

| Center Number | Atomic Number | Atomic Type | Coordinates (Angstroms) |           |          |
|---------------|---------------|-------------|-------------------------|-----------|----------|
|               |               |             | X                       | Y         | Z        |
| 1             | 5             | 0           | 0.000000                | 1.431633  | 0.000000 |
| 2             | 1             | 0           | 0.000000                | 2.628705  | 0.000000 |
| 3             | 5             | 0           | 1.239831                | -0.715817 | 0.000000 |
| 4             | 1             | 0           | 2.276525                | -1.314353 | 0.000000 |
| 5             | 5             | 0           | -1.239831               | -0.715817 | 0.000000 |
| 6             | 1             | 0           | -2.276525               | -1.314353 | 0.000000 |
| 7             | 7             | 0           | -1.245760               | 0.719240  | 0.000000 |
| 8             | 7             | 0           | 1.245760                | 0.719240  | 0.000000 |
| 9             | 7             | 0           | 0.000000                | -1.438480 | 0.000000 |
| 10            | 16            | 0           | -2.791590               | 1.611725  | 0.000000 |
| 11            | 16            | 0           | 2.791590                | 1.611725  | 0.000000 |
| 12            | 16            | 0           | 0.000000                | -3.223450 | 0.000000 |

B3LYP/6-311+G\*\*

E = -1435.3396517 a.u.

| Center Number | Atomic Number | Atomic Type | Coordinates (Angstroms) |           |          |
|---------------|---------------|-------------|-------------------------|-----------|----------|
|               |               |             | X                       | Y         | Z        |
| 1             | 7             | 0           | 0.000000                | 1.436954  | 0.000000 |
| 2             | 7             | 0           | -1.244531               | -0.718829 | 0.000000 |
| 3             | 7             | 0           | 1.244531                | -0.718829 | 0.000000 |
| 4             | 5             | 0           | 0.000000                | -1.444588 | 0.000000 |
| 5             | 1             | 0           | 0.000000                | -2.641431 | 0.000000 |
| 6             | 5             | 0           | 1.250648                | 0.721858  | 0.000000 |
| 7             | 1             | 0           | 2.287329                | 1.320014  | 0.000000 |
| 8             | 5             | 0           | -1.250648               | 0.721858  | 0.000000 |
| 9             | 1             | 0           | -2.287329               | 1.320014  | 0.000000 |
| 10            | 16            | 0           | 0.000000                | 3.258376  | 0.000000 |
| 11            | 16            | 0           | -2.822287               | -1.628854 | 0.000000 |
| 12            | 16            | 0           | 2.822287                | -1.628854 | 0.000000 |

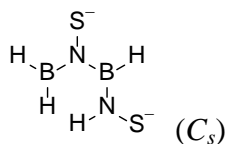

HF/6-311+G\*\* imaginary frequency:  $-61.584 \text{ cm}^{-1}$

E =  $-955.6985147 \text{ a.u.}$

| Center Number | Atomic Number | Atomic Type | Coordinates (Angstroms) |           |          |
|---------------|---------------|-------------|-------------------------|-----------|----------|
|               |               |             | X                       | Y         | Z        |
| 1             | 5             | 0           | -0.577221               | -2.088182 | 0.000000 |
| 2             | 1             | 0           | 0.590893                | -2.407180 | 0.000000 |
| 3             | 1             | 0           | -1.373918               | -2.991445 | 0.000000 |
| 4             | 5             | 0           | 0.000000                | 0.375852  | 0.000000 |
| 5             | 1             | 0           | -0.449384               | 1.479876  | 0.000000 |
| 6             | 7             | 0           | -0.959179               | -0.759460 | 0.000000 |
| 7             | 7             | 0           | 1.387534                | 0.209839  | 0.000000 |
| 8             | 1             | 0           | 1.757872                | -0.710495 | 0.000000 |
| 9             | 16            | 0           | -2.709405               | -0.361816 | 0.000000 |
| 10            | 16            | 0           | 2.669540                | 1.426706  | 0.000000 |

B3LYP/6-311+G\*\* imaginary frequency:  $-82.765 \text{ cm}^{-1}$

E =  $-958.1426809 \text{ a.u.}$

| Center Number | Atomic Number | Atomic Type | Coordinates (Angstroms) |           |          |
|---------------|---------------|-------------|-------------------------|-----------|----------|
|               |               |             | X                       | Y         | Z        |
| 1             | 7             | 0           | -0.988091               | -0.737846 | 0.000000 |
| 2             | 7             | 0           | 1.380598                | 0.172466  | 0.000000 |
| 3             | 5             | 0           | -0.639854               | -2.083224 | 0.000000 |
| 4             | 1             | 0           | -1.461110               | -2.963429 | 0.000000 |
| 5             | 5             | 0           | 0.000000                | 0.389330  | 0.000000 |
| 6             | 1             | 0           | -0.418717               | 1.505821  | 0.000000 |
| 7             | 16            | 0           | -2.744356               | -0.260902 | 0.000000 |
| 8             | 16            | 0           | 2.750009                | 1.328117  | 0.000000 |
| 9             | 1             | 0           | 1.713126                | -0.780465 | 0.000000 |
| 10            | 1             | 0           | 0.527992                | -2.410241 | 0.000000 |

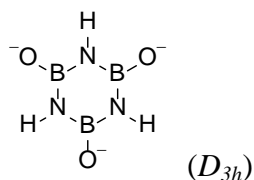

HF/6-311+G\*\*

E = -463.8746512 a.u.

| Center Number | Atomic Number | Atomic Type | Coordinates (Angstroms) |           |          |
|---------------|---------------|-------------|-------------------------|-----------|----------|
|               |               |             | X                       | Y         | Z        |
| 1             | 5             | 0           | 1.336296                | 0.771511  | 0.000000 |
| 2             | 5             | 0           | 0.000000                | -1.543022 | 0.000000 |
| 3             | 5             | 0           | -1.336296               | 0.771511  | 0.000000 |
| 4             | 7             | 0           | 0.000000                | 1.414497  | 0.000000 |
| 5             | 1             | 0           | 0.000000                | 2.411413  | 0.000000 |
| 6             | 7             | 0           | 1.224990                | -0.707249 | 0.000000 |
| 7             | 1             | 0           | 2.088345                | -1.205707 | 0.000000 |
| 8             | 7             | 0           | -1.224990               | -0.707249 | 0.000000 |
| 9             | 1             | 0           | -2.088345               | -1.205707 | 0.000000 |
| 10            | 8             | 0           | 0.000000                | -2.873590 | 0.000000 |
| 11            | 8             | 0           | -2.488602               | 1.436795  | 0.000000 |
| 12            | 8             | 0           | 2.488602                | 1.436795  | 0.000000 |

B3LYP/6-311+G\*\*

E = -466.5343174 a.u.

| Center Number | Atomic Number | Atomic Type | Coordinates (Angstroms) |           |          |
|---------------|---------------|-------------|-------------------------|-----------|----------|
|               |               |             | X                       | Y         | Z        |
| 1             | 5             | 0           | 1.340382                | 0.773870  | 0.000000 |
| 2             | 5             | 0           | 0.000000                | -1.547740 | 0.000000 |
| 3             | 5             | 0           | -1.340382               | 0.773870  | 0.000000 |
| 4             | 7             | 0           | 0.000000                | 1.417664  | 0.000000 |
| 5             | 1             | 0           | 0.000000                | 2.429606  | 0.000000 |
| 6             | 7             | 0           | 1.227733                | -0.708832 | 0.000000 |
| 7             | 1             | 0           | 2.104101                | -1.214803 | 0.000000 |
| 8             | 7             | 0           | -1.227733               | -0.708832 | 0.000000 |
| 9             | 1             | 0           | -2.104101               | -1.214803 | 0.000000 |
| 10            | 8             | 0           | 0.000000                | -2.897250 | 0.000000 |
| 11            | 8             | 0           | -2.509092               | 1.448625  | 0.000000 |
| 12            | 8             | 0           | 2.509092                | 1.448625  | 0.000000 |

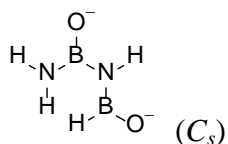

HF/6-311+G\*\* imaginary frequency:  $-419.777\text{ cm}^{-1}$

E =  $-310.4816853$  a.u.

| Center Number | Atomic Number | Atomic Type | Coordinates (Angstroms) |           |          |
|---------------|---------------|-------------|-------------------------|-----------|----------|
|               |               |             | X                       | Y         | Z        |
| 1             | 5             | 0           | 1.458744                | 0.737870  | 0.000000 |
| 2             | 1             | 0           | 2.062112                | -0.382456 | 0.000000 |
| 3             | 5             | 0           | -0.981593               | -0.525923 | 0.000000 |
| 4             | 7             | 0           | 0.000000                | 0.587227  | 0.000000 |
| 5             | 1             | 0           | -0.466536               | 1.471476  | 0.000000 |
| 6             | 7             | 0           | -0.359312               | -1.886750 | 0.000000 |
| 7             | 1             | 0           | -0.938021               | -2.693373 | 0.000000 |
| 8             | 1             | 0           | 0.620129                | -2.045896 | 0.000000 |
| 9             | 8             | 0           | -2.279563               | -0.384173 | 0.000000 |
| 10            | 8             | 0           | 2.136031                | 1.845070  | 0.000000 |



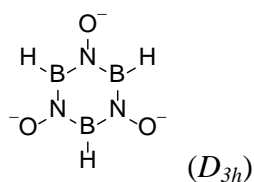

HF/6-311+G\*\*

E = -463.4529932 a.u.

| Center Number | Atomic Number | Atomic Type | Coordinates (Angstroms) |           |          |
|---------------|---------------|-------------|-------------------------|-----------|----------|
|               |               |             | X                       | Y         | Z        |
| 1             | 5             | 0           | 0.000000                | 1.422951  | 0.000000 |
| 2             | 1             | 0           | 0.000000                | 2.639198  | 0.000000 |
| 3             | 5             | 0           | 1.232312                | -0.711475 | 0.000000 |
| 4             | 1             | 0           | 2.285613                | -1.319599 | 0.000000 |
| 5             | 5             | 0           | -1.232312               | -0.711475 | 0.000000 |
| 6             | 1             | 0           | -2.285613               | -1.319599 | 0.000000 |
| 7             | 7             | 0           | 1.241897                | 0.717010  | 0.000000 |
| 8             | 7             | 0           | 0.000000                | -1.434020 | 0.000000 |
| 9             | 7             | 0           | -1.241897               | 0.717010  | 0.000000 |
| 10            | 8             | 0           | 0.000000                | -2.839942 | 0.000000 |
| 11            | 8             | 0           | 2.459462                | 1.419971  | 0.000000 |
| 12            | 8             | 0           | -2.459462               | 1.419971  | 0.000000 |

B3LYP/6-311+G\*\*

E = -466.1539202 a.u.

| Center Number | Atomic Number | Atomic Type | Coordinates (Angstroms) |           |          |
|---------------|---------------|-------------|-------------------------|-----------|----------|
|               |               |             | X                       | Y         | Z        |
| 1             | 7             | 0           | 0.000000                | 1.440397  | 0.000000 |
| 2             | 7             | 0           | 1.247421                | -0.720199 | 0.000000 |
| 3             | 7             | 0           | -1.247421               | -0.720199 | 0.000000 |
| 4             | 5             | 0           | 0.000000                | -1.440987 | 0.000000 |
| 5             | 1             | 0           | 0.000000                | -2.651768 | 0.000000 |
| 6             | 5             | 0           | -1.247932               | 0.720494  | 0.000000 |
| 7             | 1             | 0           | -2.296499               | 1.325884  | 0.000000 |
| 8             | 5             | 0           | 1.247932                | 0.720494  | 0.000000 |
| 9             | 1             | 0           | 2.296499                | 1.325884  | 0.000000 |
| 10            | 8             | 0           | 0.000000                | 2.864889  | 0.000000 |
| 11            | 8             | 0           | -2.481067               | -1.432444 | 0.000000 |
| 12            | 8             | 0           | 2.481067                | -1.432444 | 0.000000 |

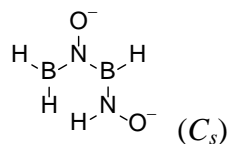

HF/6-311+G\*\* imaginary frequency:  $-109.256\text{ cm}^{-1}$

E =  $-310.192787$  a.u.

| Center Number | Atomic Number | Atomic Type | Coordinates (Angstroms) |           |          |
|---------------|---------------|-------------|-------------------------|-----------|----------|
|               |               |             | X                       | Y         | Z        |
| 1             | 5             | 0           | -0.666086               | -1.859098 | 0.000000 |
| 2             | 1             | 0           | 0.491053                | -2.233781 | 0.000000 |
| 3             | 1             | 0           | -1.521316               | -2.722500 | 0.000000 |
| 4             | 5             | 0           | 0.000000                | 0.605135  | 0.000000 |
| 5             | 1             | 0           | -0.465681               | 1.711275  | 0.000000 |
| 6             | 7             | 0           | -0.983187               | -0.526601 | 0.000000 |
| 7             | 7             | 0           | 1.375295                | 0.455737  | 0.000000 |
| 8             | 1             | 0           | 1.771366                | -0.458449 | 0.000000 |
| 9             | 8             | 0           | -2.310103               | -0.134015 | 0.000000 |
| 10            | 8             | 0           | 2.348885                | 1.442679  | 0.000000 |

B3LYP/6-311+G\*\* imaginary frequency:  $-127.568\text{ cm}^{-1}$

E =  $-312.0412406$  a.u.

| Center Number | Atomic Number | Atomic Type | Coordinates (Angstroms) |           |          |
|---------------|---------------|-------------|-------------------------|-----------|----------|
|               |               |             | X                       | Y         | Z        |
| 1             | 7             | 0           | -1.011681               | -0.497708 | 0.000000 |
| 2             | 7             | 0           | 1.376815                | 0.427748  | 0.000000 |
| 3             | 5             | 0           | 0.000000                | 0.629291  | 0.000000 |
| 4             | 1             | 0           | -0.434325               | 1.747072  | 0.000000 |
| 5             | 5             | 0           | -0.709815               | -1.862012 | 0.000000 |
| 6             | 1             | 0           | -1.584434               | -2.700801 | 0.000000 |
| 7             | 8             | 0           | -2.318263               | -0.049630 | 0.000000 |
| 8             | 8             | 0           | 2.424036                | 1.345022  | 0.000000 |
| 9             | 1             | 0           | 1.716853                | -0.530471 | 0.000000 |
| 10            | 1             | 0           | 0.448857                | -2.225606 | 0.000000 |
